# Supplementary material for: An “expressionistic” look at serrated precancerous colorectal lesions
Source: PubMed Central journal article supplement (PMC7797135; doi:10.1186/s13000-020-01064-1), 2021-01-10

A

| Samples from Kanth P. et al., 2016 (GSE76987 RNA sequencing data) |           |                        |               |     |        |
|-------------------------------------------------------------------|-----------|------------------------|---------------|-----|--------|
| SRR ID                                                            | name      | tissue                 | colon segment | age | gender |
| SRR3106772                                                        | SSA/P -1  | Serrated Polyposis     | ascending     | 28  | M      |
| SRR3106773                                                        | SSA/P -2  | Serrated Polyposis     | ascending     | 51  | M      |
| SRR3106774                                                        | SSA/P -3  | Serrated Polyposis     | transversum   | 51  | M      |
| SRR3106775                                                        | SSA/P -4  | Serrated Polyposis     | cecum         | 76  | M      |
| SRR3106776                                                        | SSA/P -5  | Serrated Polyposis     | ascending     | 76  | M      |
| SRR3106777                                                        | SSA/P -6  | Serrated Polyposis     | transversum   | 25  | M      |
| SRR3106778                                                        | SSA/P -7  | Serrated Polyposis     | ascending     | 31  | M      |
| SRR3106779                                                        | SSA/P -8  | Serrated Polyposis     | ascending     | 29  | F      |
| SRR3106780                                                        | SSA/P -9  | Serrated Polyposis     | descending    | 20  | F      |
| SRR3106781                                                        | SSA/P -10 | Serrated Polyposis     | descending    | 20  | F      |
| SRR3106782                                                        | SSA/P -11 | Serrated Polyposis     | ascending     | 47  | F      |
| SRR3106783                                                        | SSA/P -12 | Serrated Polyposis     | ascending     | 47  | F      |
| SRR3106784                                                        | SSA/P -13 | Sporadic SSA/P         | right flexure | 58  | M      |
| SRR3106785                                                        | SSA/P -14 | Sporadic SSA/P         | sigmoid       | 51  | F      |
| SRR3106786                                                        | SSA/P -15 | Sporadic SSA/P         | ascending     | 65  | M      |
| SRR3106787                                                        | SSA/P -16 | Sporadic SSA/P         | cecum         | 67  | F      |
| SRR3106788                                                        | SSA/P -17 | Sporadic SSA/P         | cecum         | 61  | M      |
| SRR3106789                                                        | SSA/P -18 | Sporadic SSA/P         | transversum   | 68  | M      |
| SRR3106790                                                        | SSA/P -19 | Sporadic SSA/P         | cecum         | 67  | F      |
| SRR3106791                                                        | SSA/P -20 | Sporadic SSA/P         | ascending     | 73  | M      |
| SRR3106792                                                        | SSA/P -21 | Sporadic SSA/P         | rectum        | 64  | M      |
| SRR3106793                                                        | HP -1     | HP                     | sigmoid       | 49  | M      |
| SRR3106794                                                        | HP -2     | HP                     | sigmoid       | 66  | M      |
| SRR3106795                                                        | HP -3     | HP                     | rectum        | 64  | M      |
| SRR3106796                                                        | HP -4     | HP                     | sigmoid       | 56  | M      |
| SRR3106797                                                        | HP -5     | HP                     | right flexure | 64  | M      |
| SRR3106798                                                        | HP -6     | HP                     | rectum        | 59  | M      |
| SRR3106799                                                        | HP -7     | HP                     | sigmoid       | 64  | M      |
| SRR3106800                                                        | HP -8     | HP                     | rectum        | 64  | M      |
| SRR3106801                                                        | HP -9     | HP                     | sigmoid       | 64  | M      |
| SRR3106802                                                        | HP -10    | HP                     | left flexure  | 57  | F      |
| SRR3106803                                                        | AP -1     | cADN                   | ascending     | 49  | M      |
| SRR3106804                                                        | AP -2     | cADN                   | descending    | 65  | M      |
| SRR3106805                                                        | AP -3     | cADN                   | transversum   | 80  | M      |
| SRR3106806                                                        | AP -4     | cADN                   | ascending     | 66  | M      |
| SRR3106807                                                        | AP -5     | cADN                   | transversum   | 66  | M      |
| SRR3106808                                                        | AP -6     | cADN                   | cecum         | 44  | M      |
| SRR3106809                                                        | AP -7     | cADN                   | transversum   | 44  | M      |
| SRR3106810                                                        | AP -8     | cADN                   | ascending     | 53  | F      |
| SRR3106811                                                        | AP -9     | cADN                   | ascending     | 64  | M      |
| SRR3106812                                                        | AP -10    | cADN                   | ascending     | 50  | M      |
| SRR3106813                                                        | CA-1      | CRC                    | ascending     | NA  | NA     |
| SRR3106814                                                        | CA-2      | CRC                    | ascending     | NA  | NA     |
| SRR3106815                                                        | CA-3      | CRC                    | ascending     | NA  | NA     |
| SRR3106816                                                        | CA-4      | CRC                    | ascending     | NA  | NA     |
| SRR3106817                                                        | UR-1      | Uninvolved right colon | ascending     | 49  | M      |
| SRR3106818                                                        | UR-2      | Uninvolved right colon | ascending     | 65  | M      |
| SRR3106819                                                        | UR-3      | Uninvolved right colon | ascending     | 80  | M      |
| SRR3106820                                                        | UR-4      | Uninvolved right colon | ascending     | 66  | M      |
| SRR3106821                                                        | UR-5      | Uninvolved right colon | ascending     | 44  | M      |
| SRR3106822                                                        | UR-6      | Uninvolved right colon | ascending     | 53  | F      |
| SRR3106823                                                        | UR-7      | Uninvolved right colon | ascending     | 64  | M      |
| SRR3106824                                                        | UR-8      | Uninvolved right colon | ascending     | 50  | M      |
| SRR3106825                                                        | UR-9      | Uninvolved right colon | ascending     | 61  | M      |
| SRR3106826                                                        | UR-10     | Uninvolved right colon | ascending     | 57  | F      |
| SRR3106827                                                        | UR-11     | Uninvolved right colon | ascending     | 28  | M      |
| SRR3106828                                                        | UR-12     | Uninvolved right colon | ascending     | 51  | M      |
| SRR3106829                                                        | UR-13     | Uninvolved right colon | ascending     | 76  | M      |
| SRR3106830                                                        | UR-14     | Uninvolved right colon | ascending     | 25  | M      |
| SRR3106831                                                        | UR-15     | Uninvolved right colon | ascending     | 29  | F      |
| SRR3106832                                                        | UL-1      | Uninvolved left colon  | sigmoid       | 20  | F      |
| SRR3106833                                                        | UL-2      | Uninvolved left colon  | sigmoid       | 51  | F      |
| SRR3106834                                                        | UL-3      | Uninvolved left colon  | sigmoid       | 64  | M      |
| SRR3106835                                                        | UL-4      | Uninvolved left colon  | sigmoid       | 56  | M      |
| SRR3106836                                                        | UL-5      | Uninvolved left colon  | sigmoid       | 64  | M      |
| SRR3106837                                                        | UL-6      | Uninvolved left colon  | sigmoid       | 57  | F      |
| SRR3106838                                                        | CR-1      | Control right colon    | ascending     | 46  | F      |
| SRR3106839                                                        | CR-2      | Control right colon    | ascending     | 50  | F      |
| SRR3106840                                                        | CR-3      | Control right colon    | ascending     | 50  | M      |
| SRR3106841                                                        | CR-4      | Control right colon    | ascending     | 55  | F      |
| SRR3106842                                                        | CR-5      | Control right colon    | ascending     | 68  | M      |
| SRR3106843                                                        | CR-6      | Control right colon    | ascending     | 51  | M      |
| SRR3106844                                                        | CR-7      | Control right colon    | ascending     | 50  | F      |
| SRR3106845                                                        | CR-8      | Control right colon    | ascending     | 52  | F      |
| SRR3106846                                                        | CR-9      | Control right colon    | ascending     | 61  | F      |
| SRR3106847                                                        | CR-10     | Control right colon    | ascending     | 52  | M      |
| SRR3106848                                                        | CL-1      | Control left colon     | sigmoid       | 46  | F      |
| SRR3106849                                                        | CL-2      | Control left colon     | sigmoid       | 50  | F      |
| SRR3106850                                                        | CL-3      | Control left colon     | sigmoid       | 50  | M      |
| SRR3106851                                                        | CL-4      | Control left colon     | sigmoid       | 55  | F      |
| SRR3106852                                                        | CL-5      | Control left colon     | sigmoid       | 68  | M      |
| SRR3106853                                                        | CL-6      | Control left colon     | sigmoid       | 51  | M      |
| SRR3106854                                                        | CL-7      | Control left colon     | sigmoid       | 50  | F      |
| SRR3106855                                                        | CL-8      | Control left colon     | sigmoid       | 52  | F      |
| SRR3106856                                                        | CL-9      | Control left colon     | sigmoid       | 61  | F      |
| SRR3106857                                                        | CL-10     | Control left colon     | sigmoid       | 52  | M      |

**B** *HOXD13* mRNA expression (samples from Kanth P. et al., 2016, ref.45)

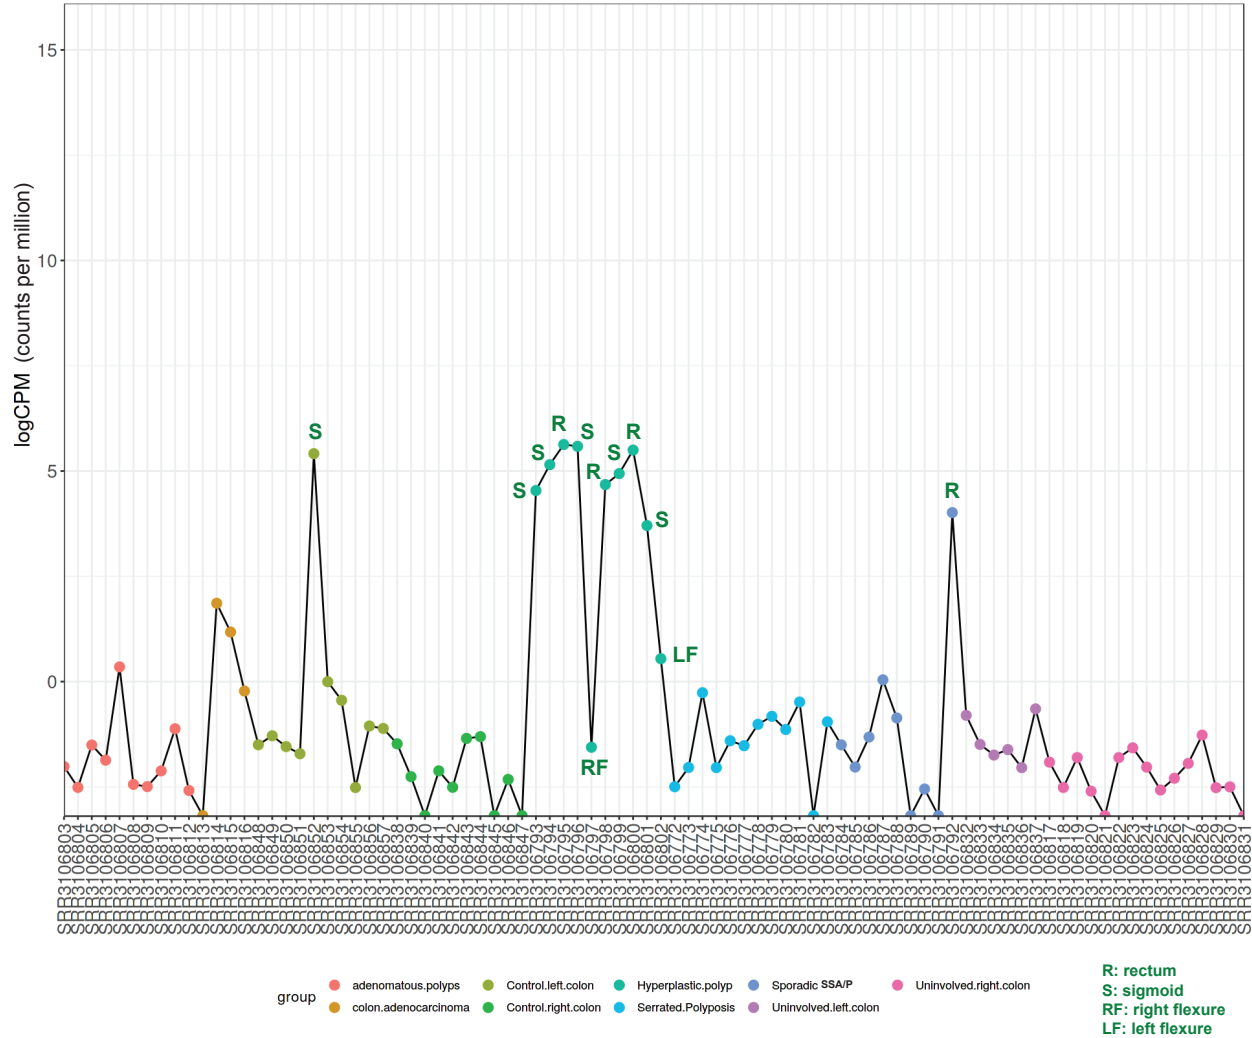

C

***HOXB13*** mRNA expression (samples from Kanth P. et al., 2016, ref.45)

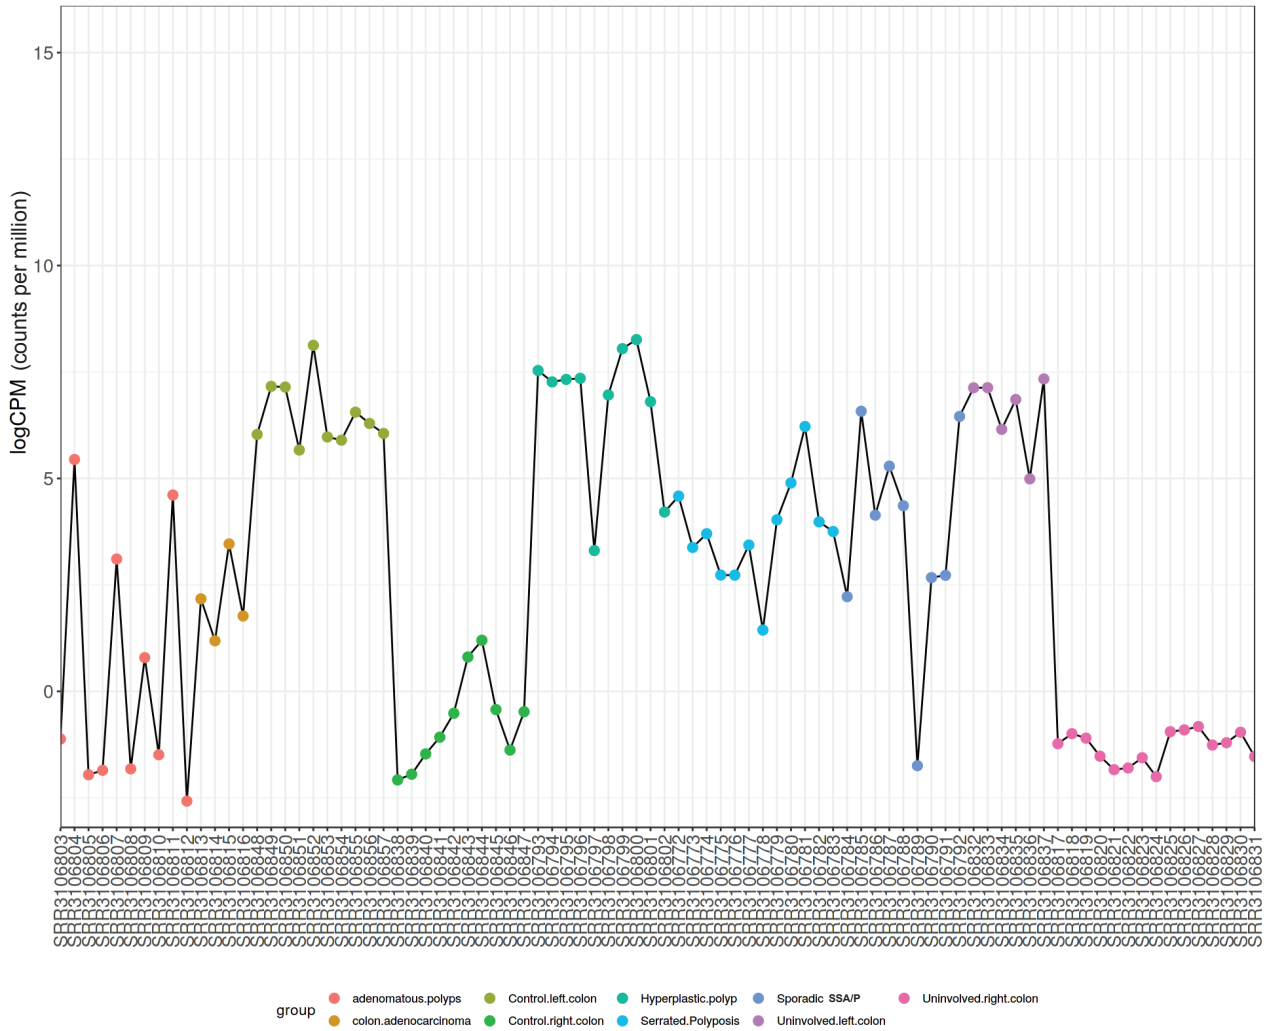

D

**FAM3B** mRNA expression (samples from Kanth P. et al., 2016, ref.45)

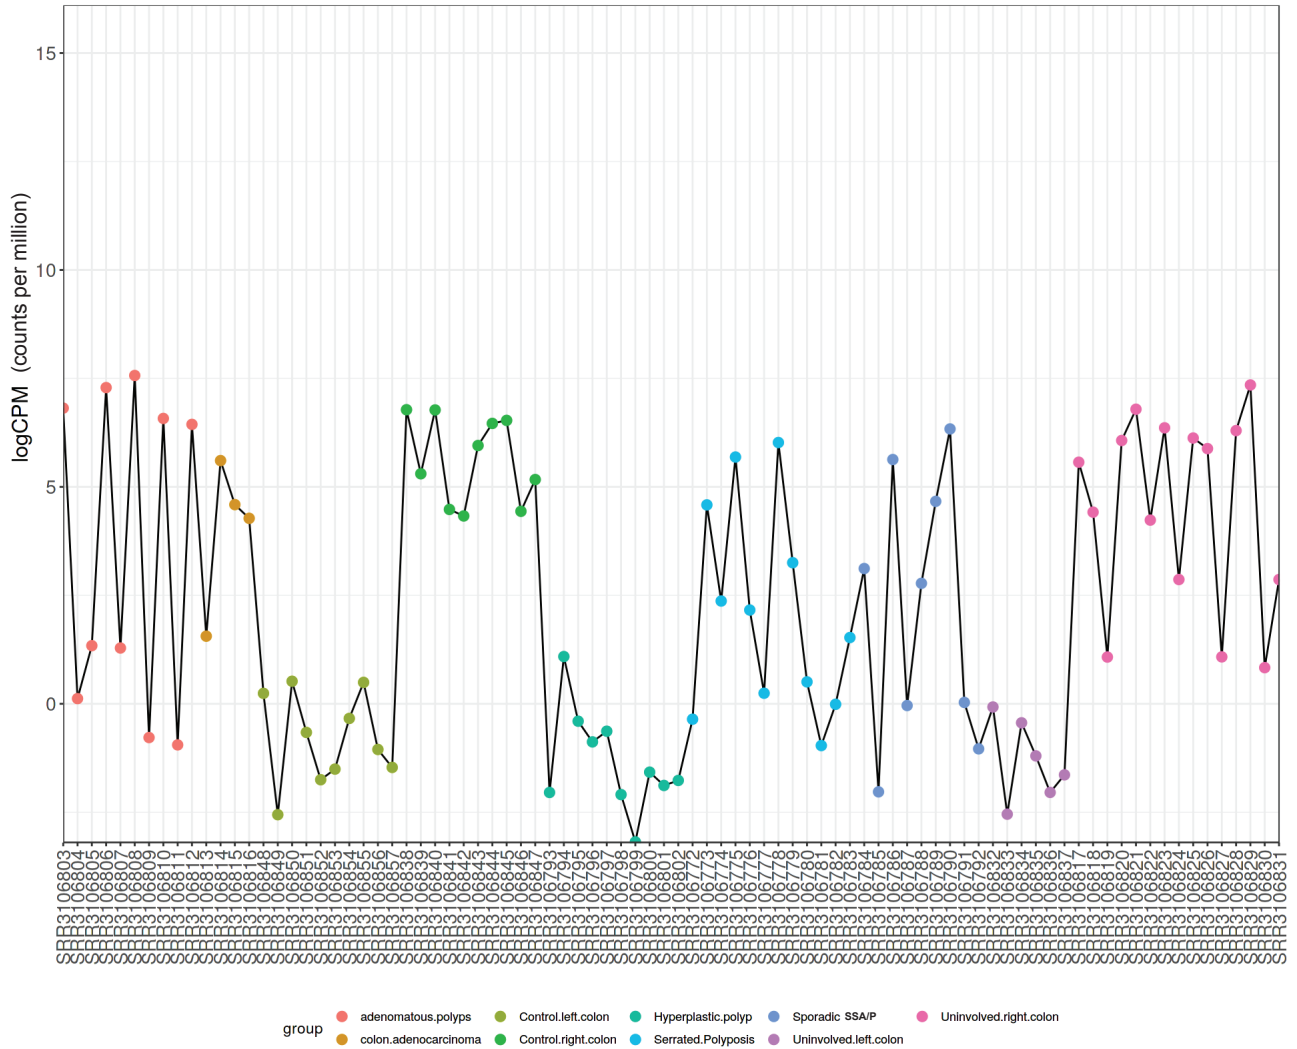

E

**EVX2** mRNA expression (samples from Kanth P. et al., 2016, ref.45)

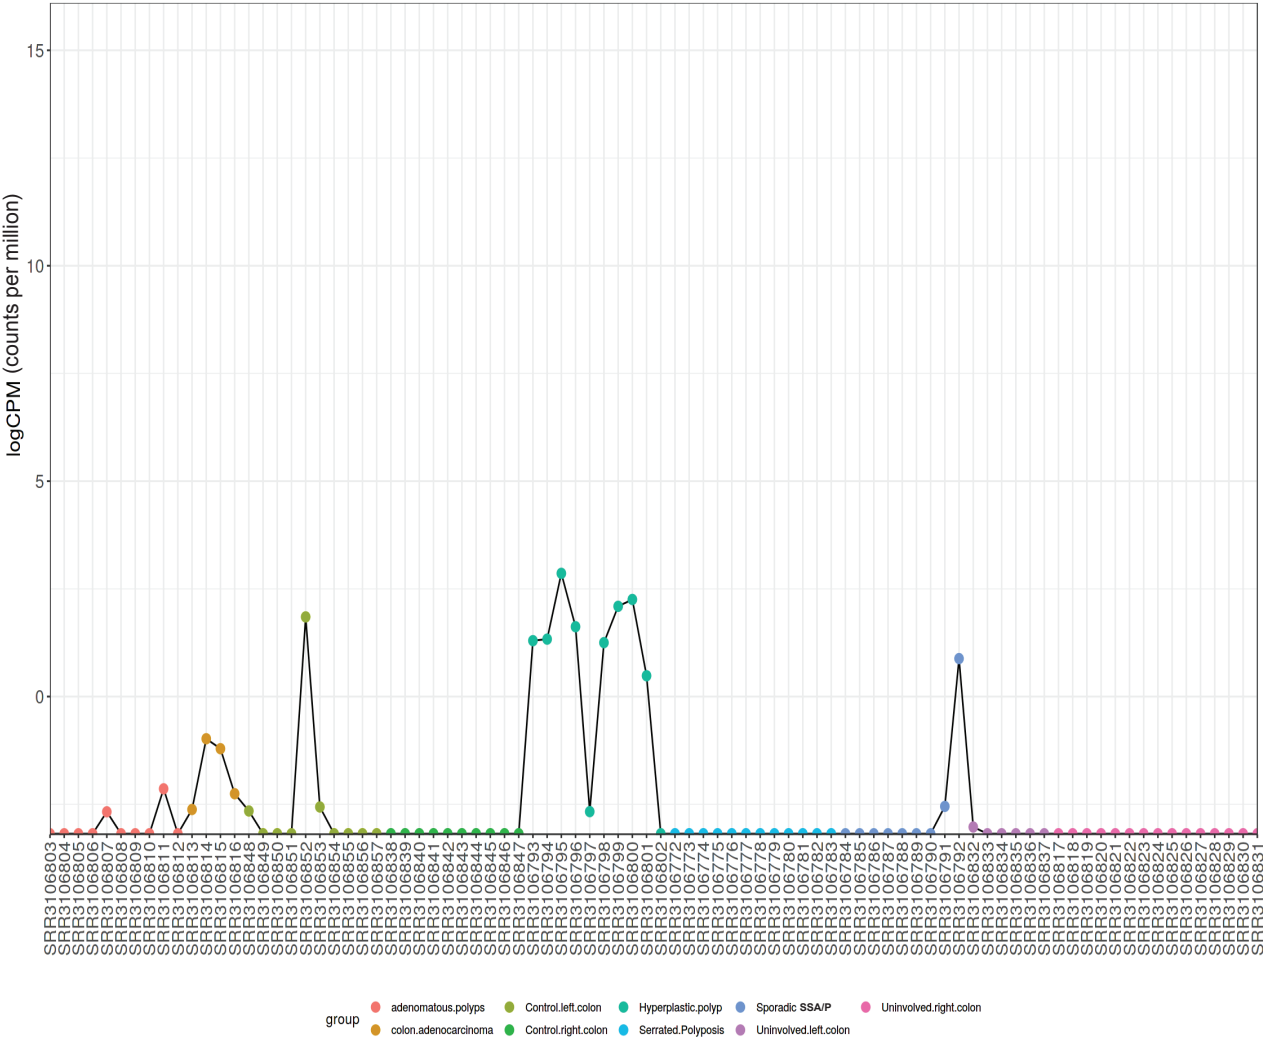

F

**PRAC1** mRNA expression (samples from Kanth P. et al., 2016, ref.45)

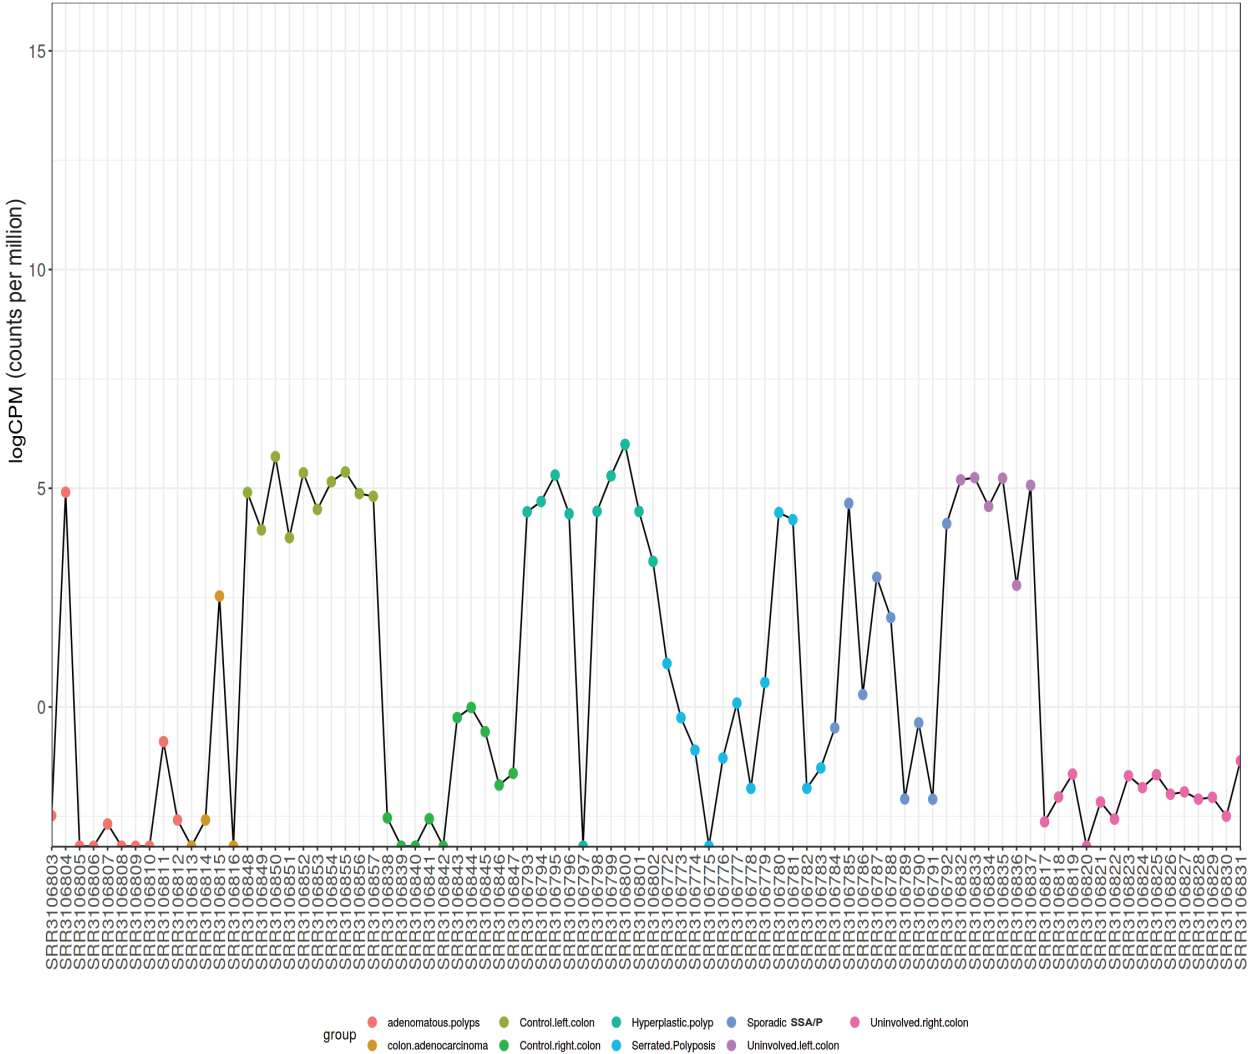

**G**

***INSL5* mRNA expression (samples from Kanth P. et al., 2016, ref.45)**

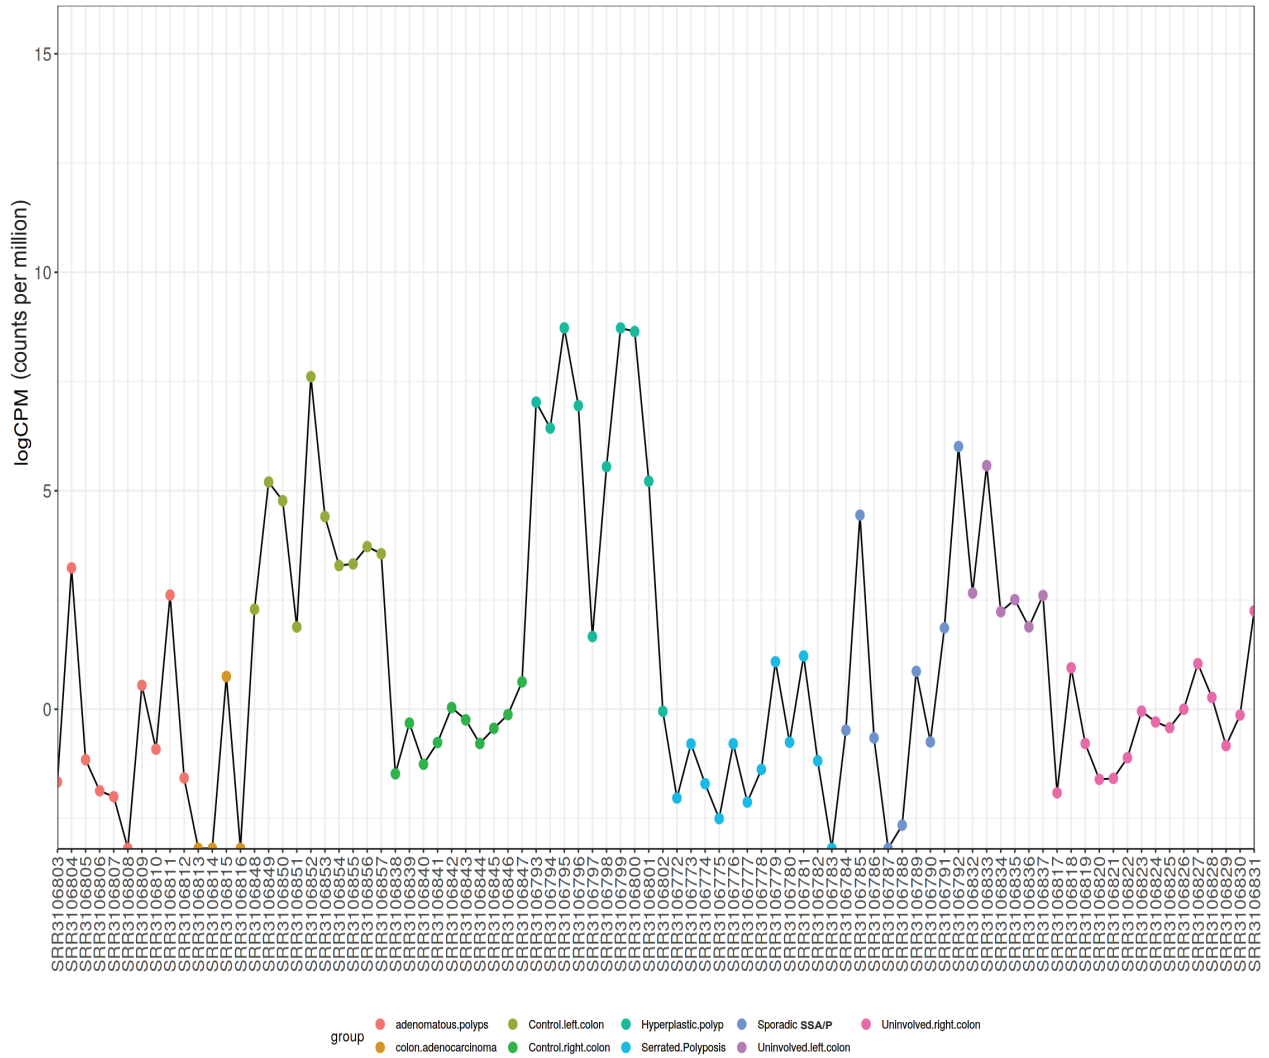

H

**OR51E2** mRNA expression (samples from Kanth P. et al., 2016, ref.45)

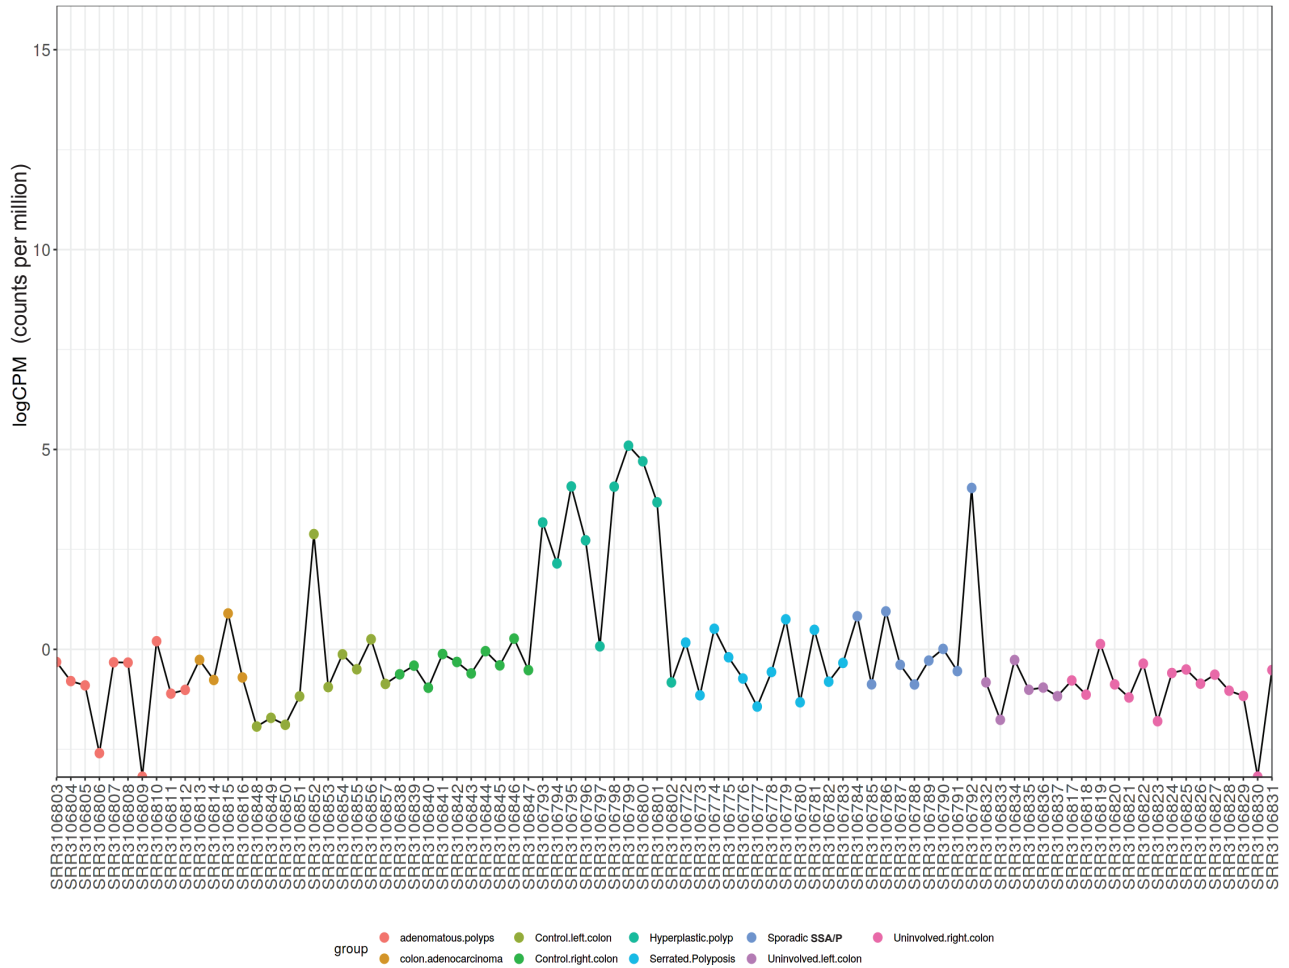



I

**CPB1 mRNA expression (samples from Kanth P. et al., 2016, ref.45)**

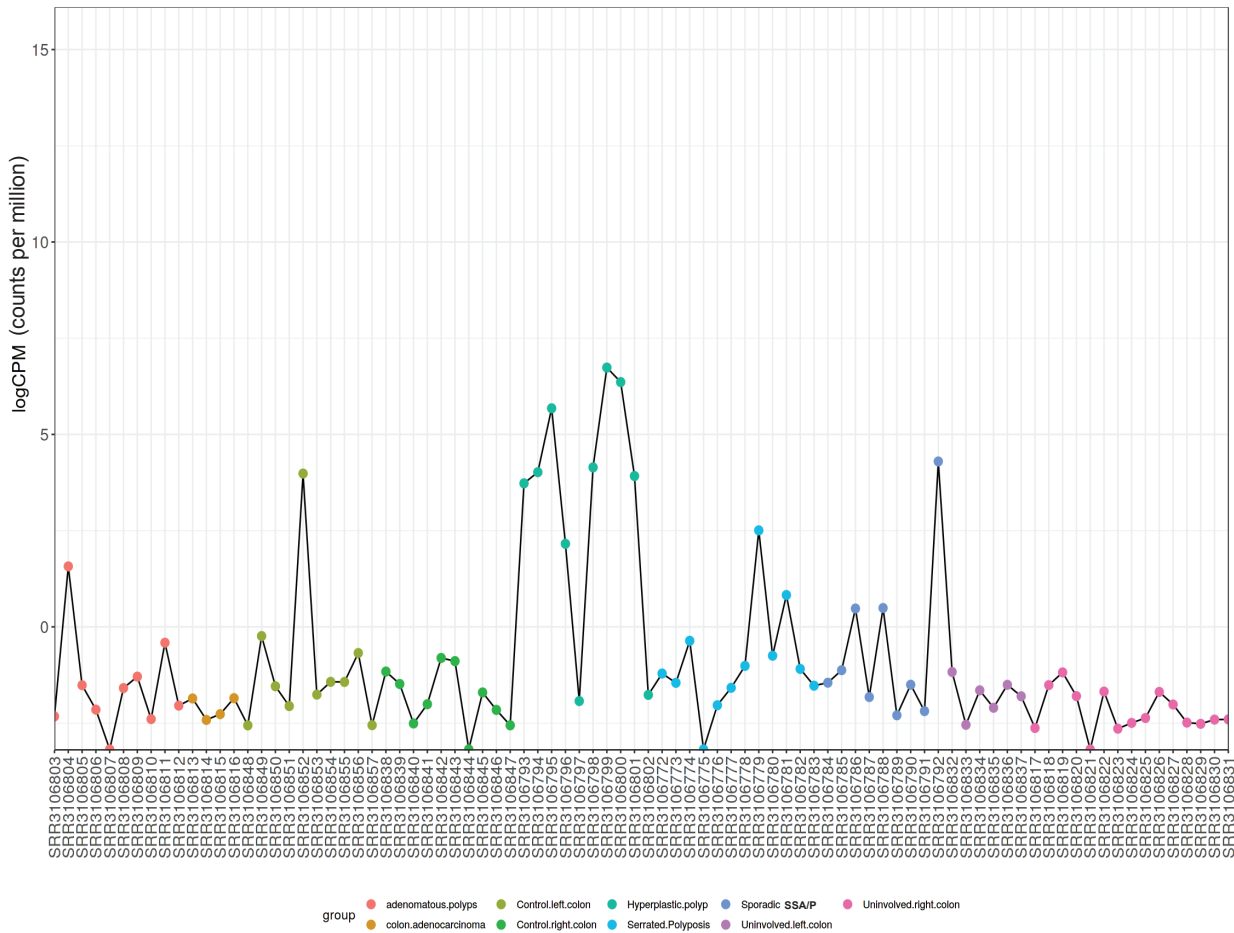

J

**ST6GAL2** mRNA expression (samples from Kanth P. et al., 2016, ref.45)

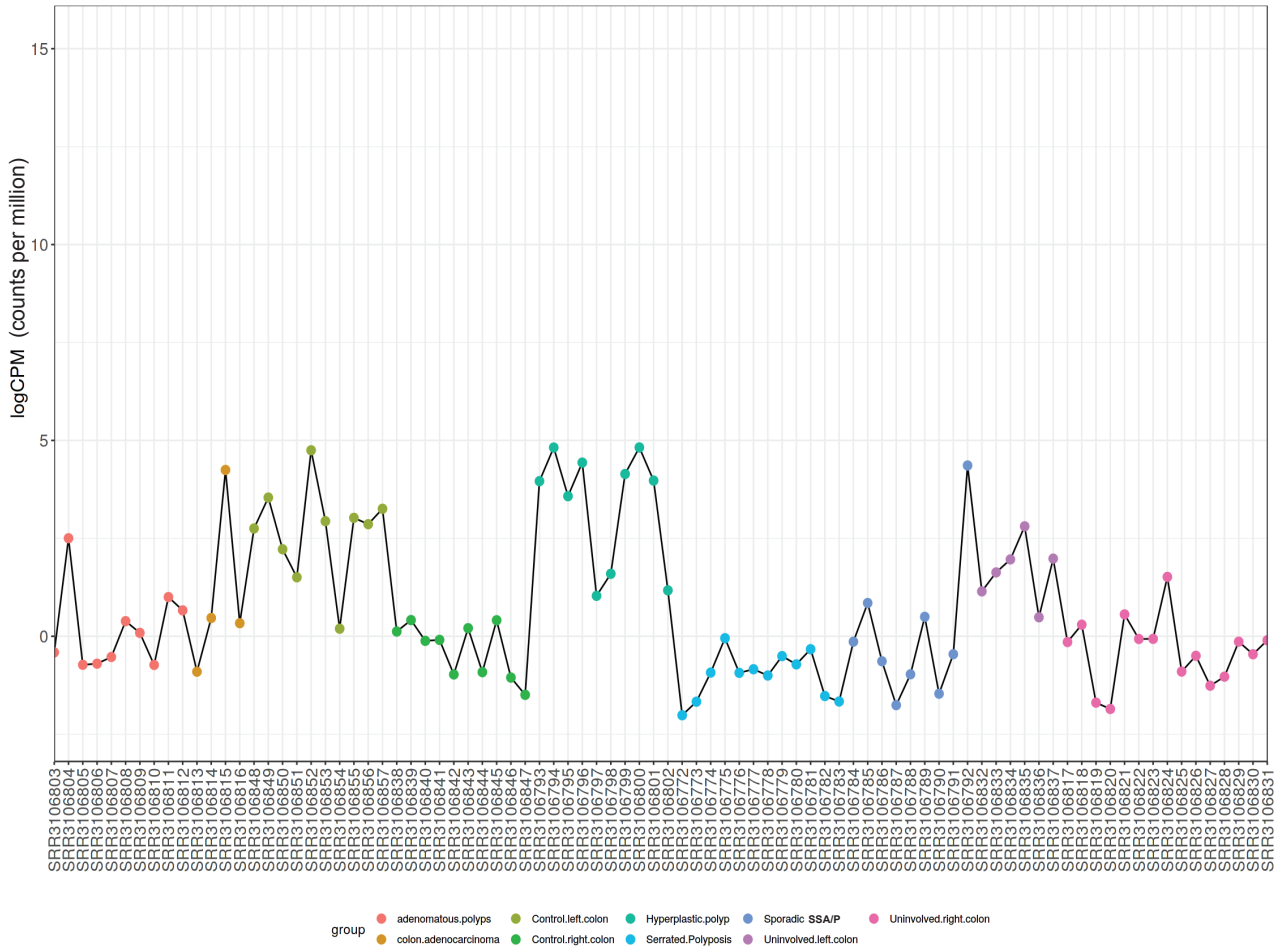

K

**AGRN** mRNA expression (samples from Kanth P. et al., 2016, ref.45)

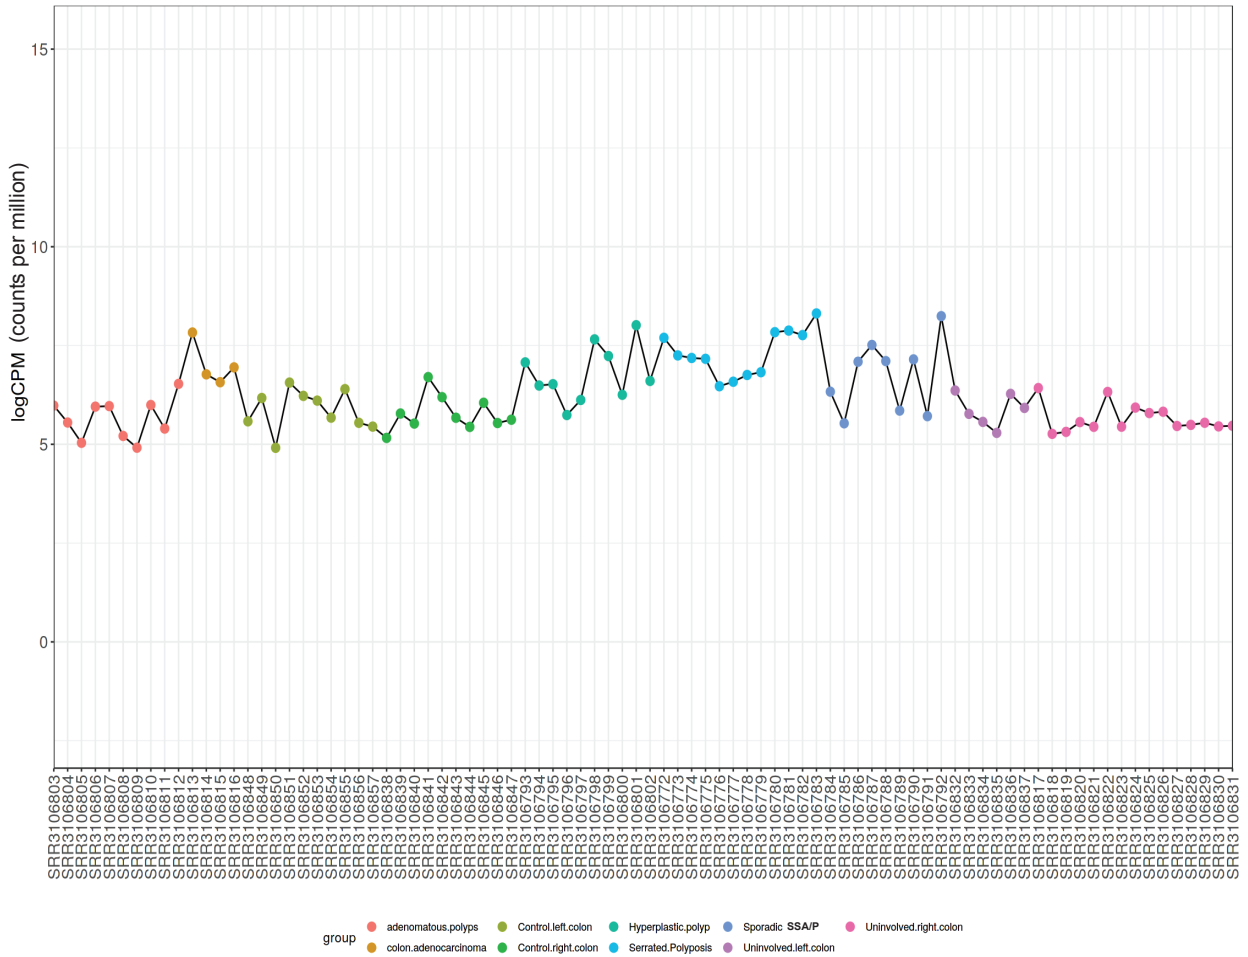

Supplement: 13000_2020_1064_MOESM3_ESM.pdf [file 13000_2020_1064_MOESM3_ESM.pdf]
