# Supplementary material for: An “expressionistic” look at serrated precancerous colorectal lesions
Source: PubMed Central journal article supplement (PMC7797135; doi:10.1186/s13000-020-01064-1), 2021-01-10
Supplement: 13000_2020_1064_MOESM1_ESM.pdf [file 13000_2020_1064_MOESM1_ESM.pdf]

**A**

**PPIB**

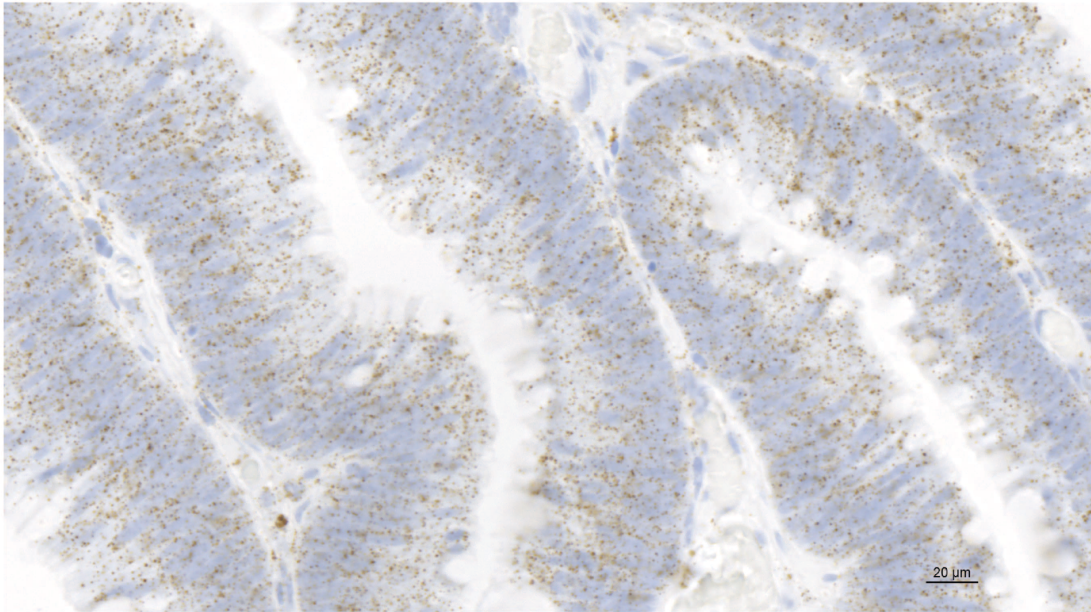

**B**

**DapB**

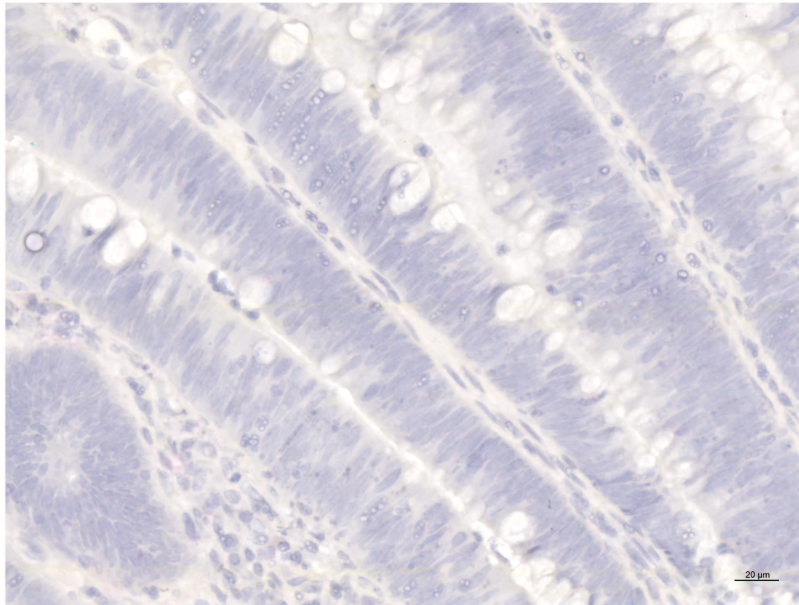

**C**

**XIST**

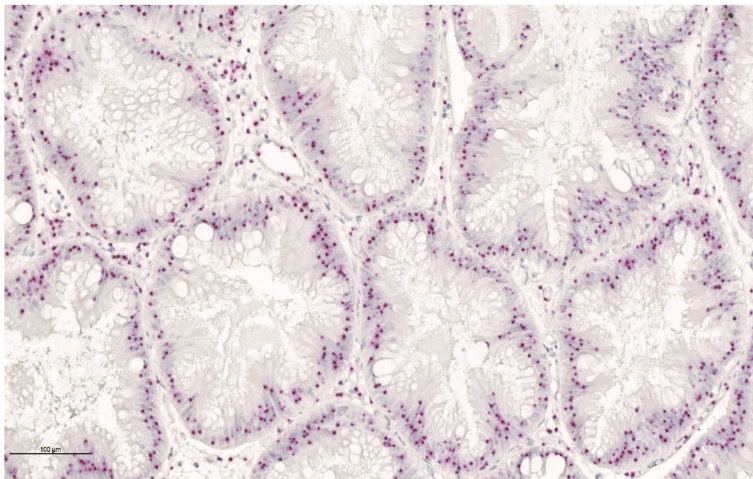

**female**

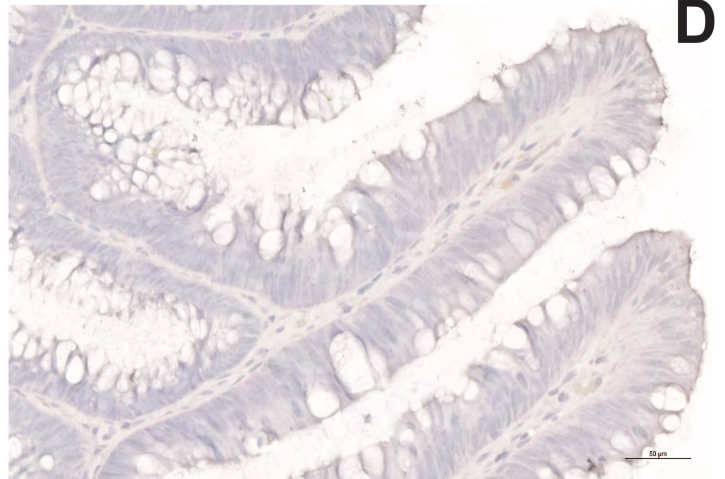

**male**

**D**
