# Supplementary material for: An “expressionistic” look at serrated precancerous colorectal lesions
Source: PubMed Central journal article supplement (PMC7797135; doi:10.1186/s13000-020-01064-1), 2021-01-10
Supplement: 13000_2020_1064_MOESM2_ESM.pdf [file 13000_2020_1064_MOESM2_ESM.pdf]

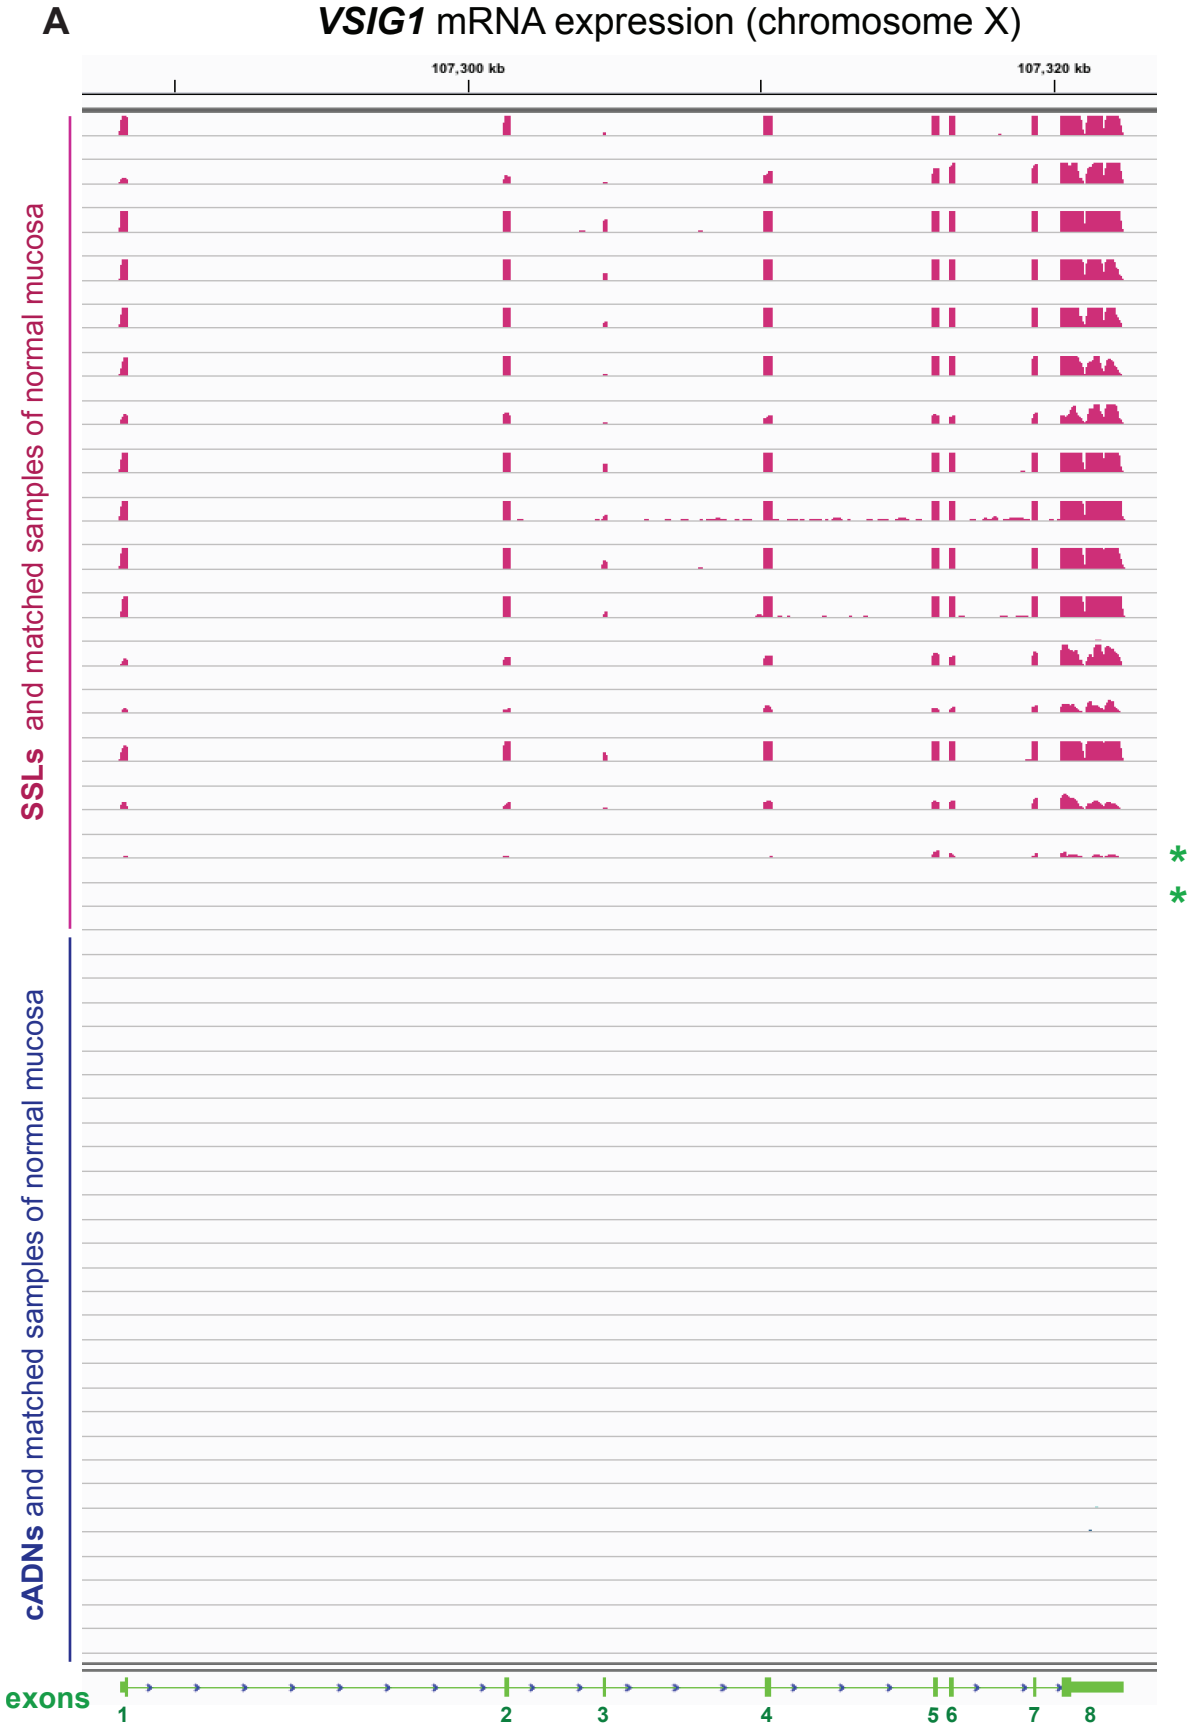

\* The 2 lesions showing histologic features of both SSLs and cADNs (samples S6 and S16 of Table 1, Parker H. et al. 2018)

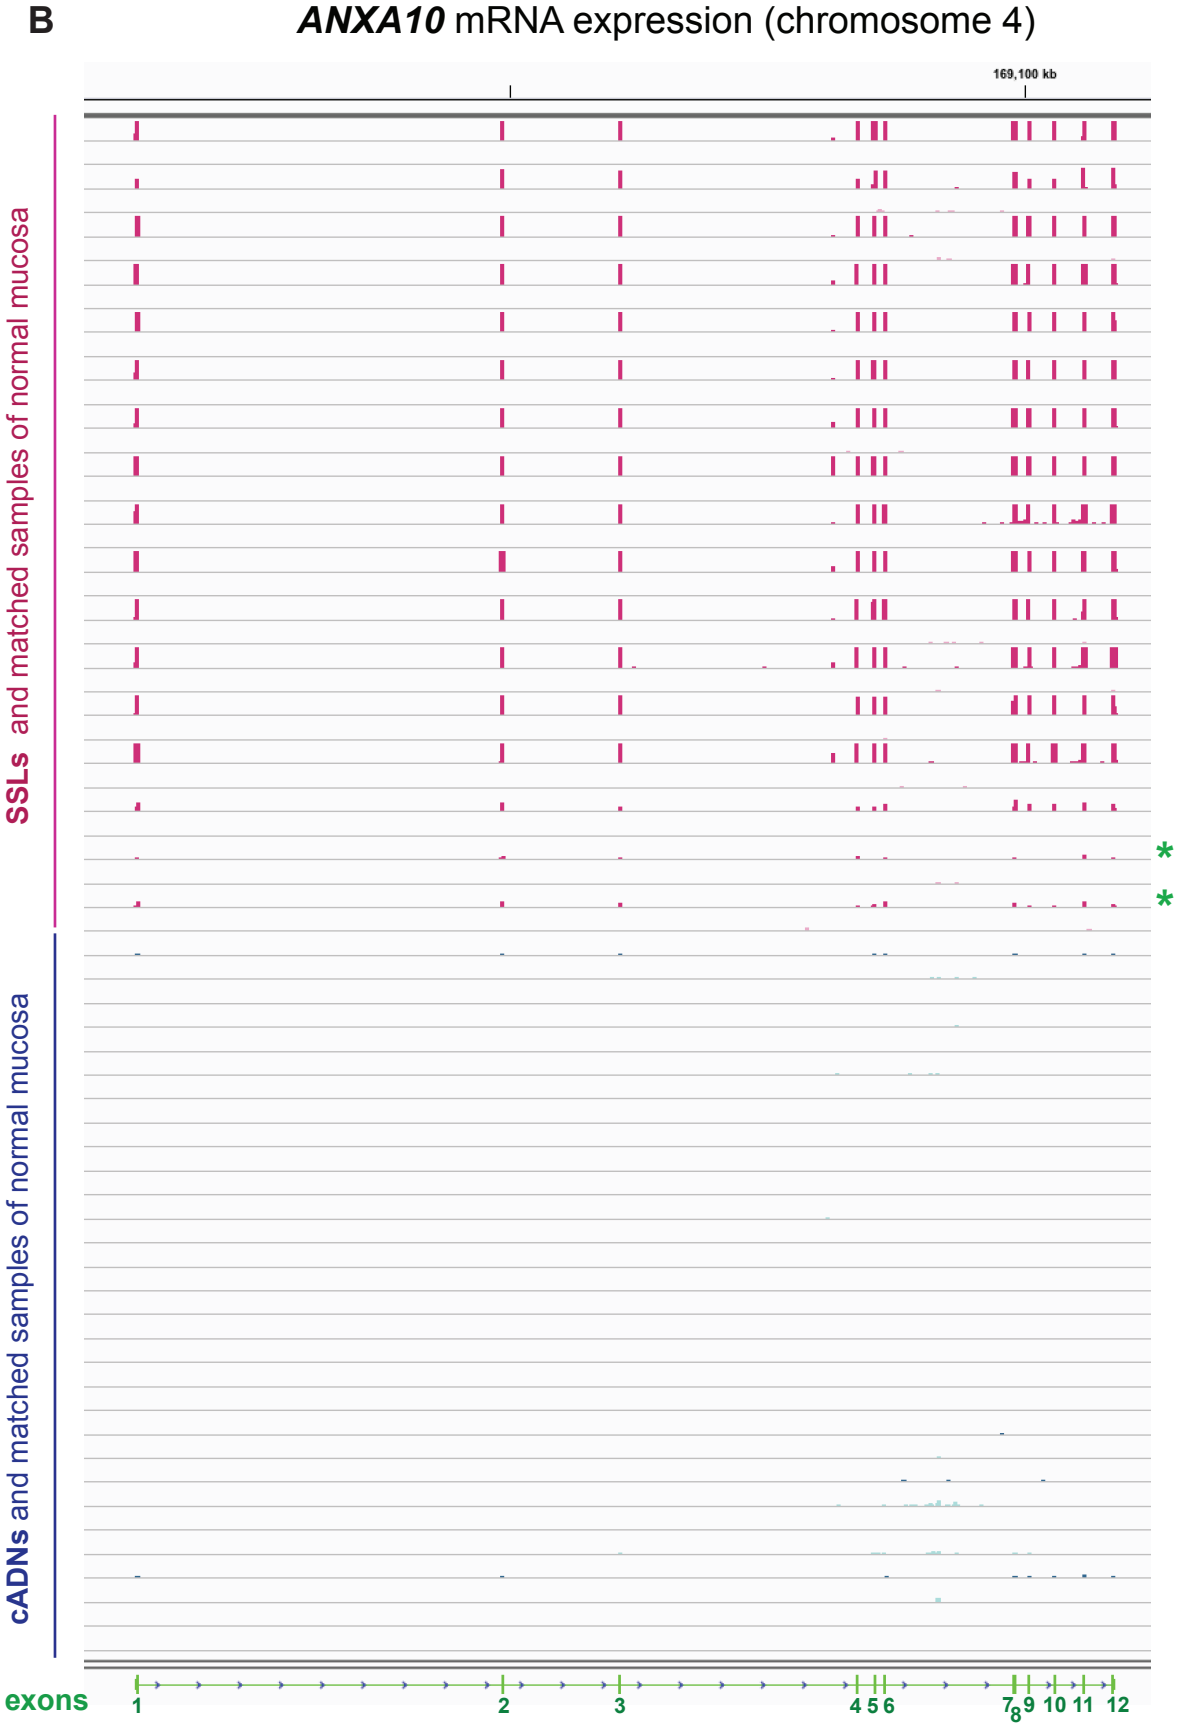

\* The 2 lesions showing histologic features of both SSLs and cADNs (samples S6 and S16 of Table 1, Parker H. et al. 2018)

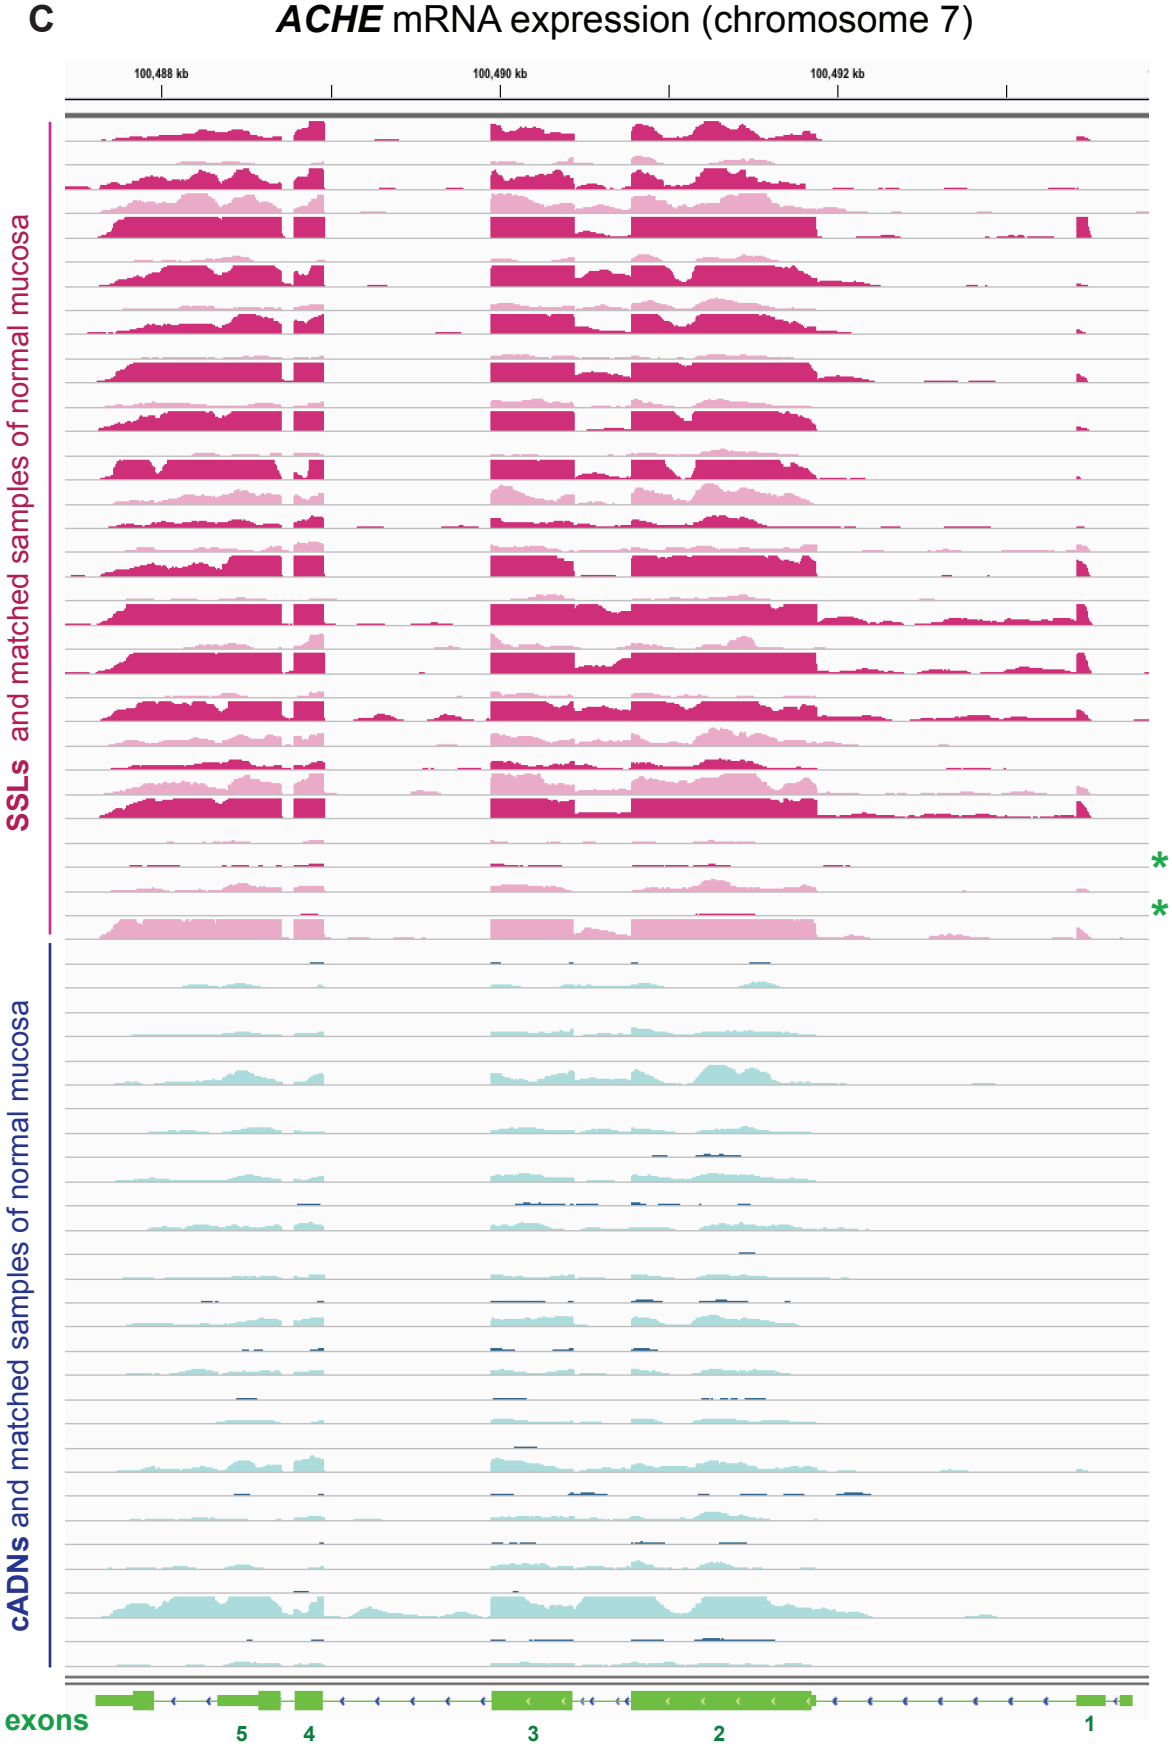

\* The 2 lesions showing histologic features of both SSLs and cADNs (samples S6 and S16 of Table 1, Parker H. et al. 2018)

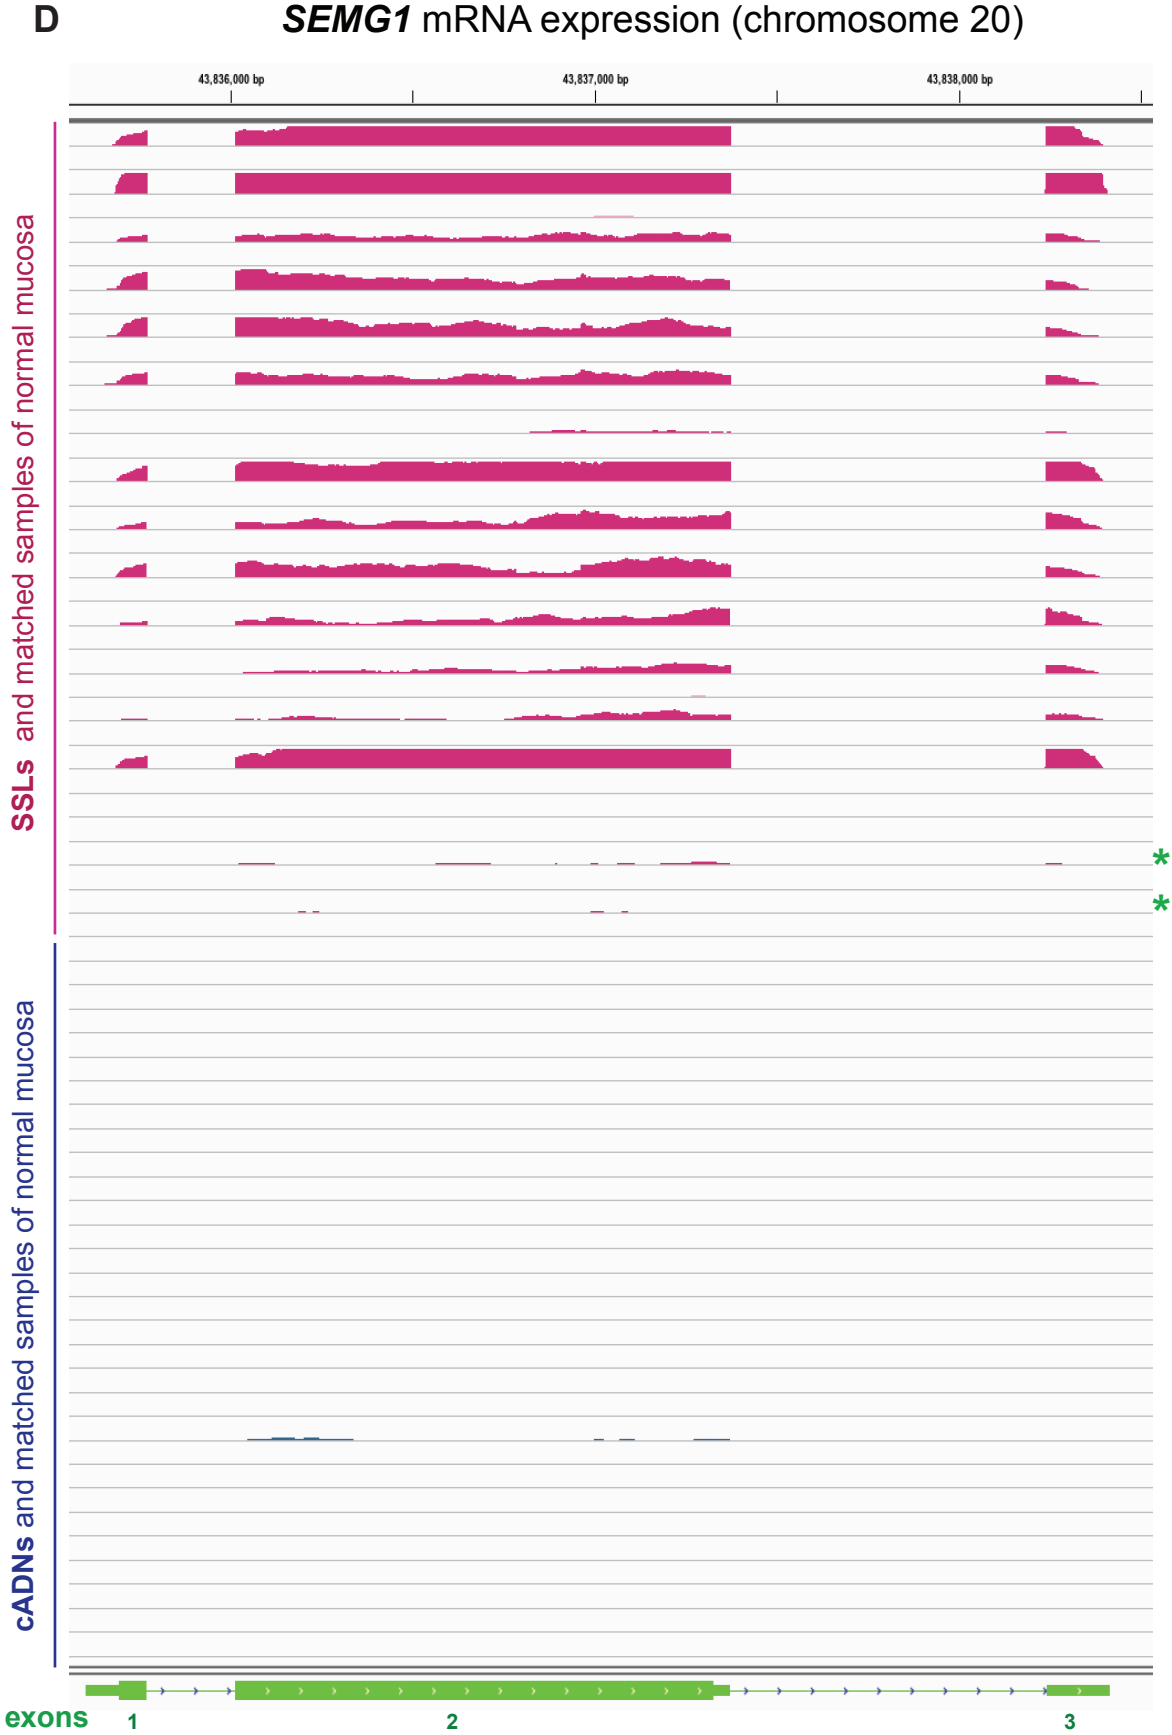

\* The 2 lesions showing histologic features of both SSLs and cADNs (samples S6 and S16 of Table 1, Parker H. et al. 2018)

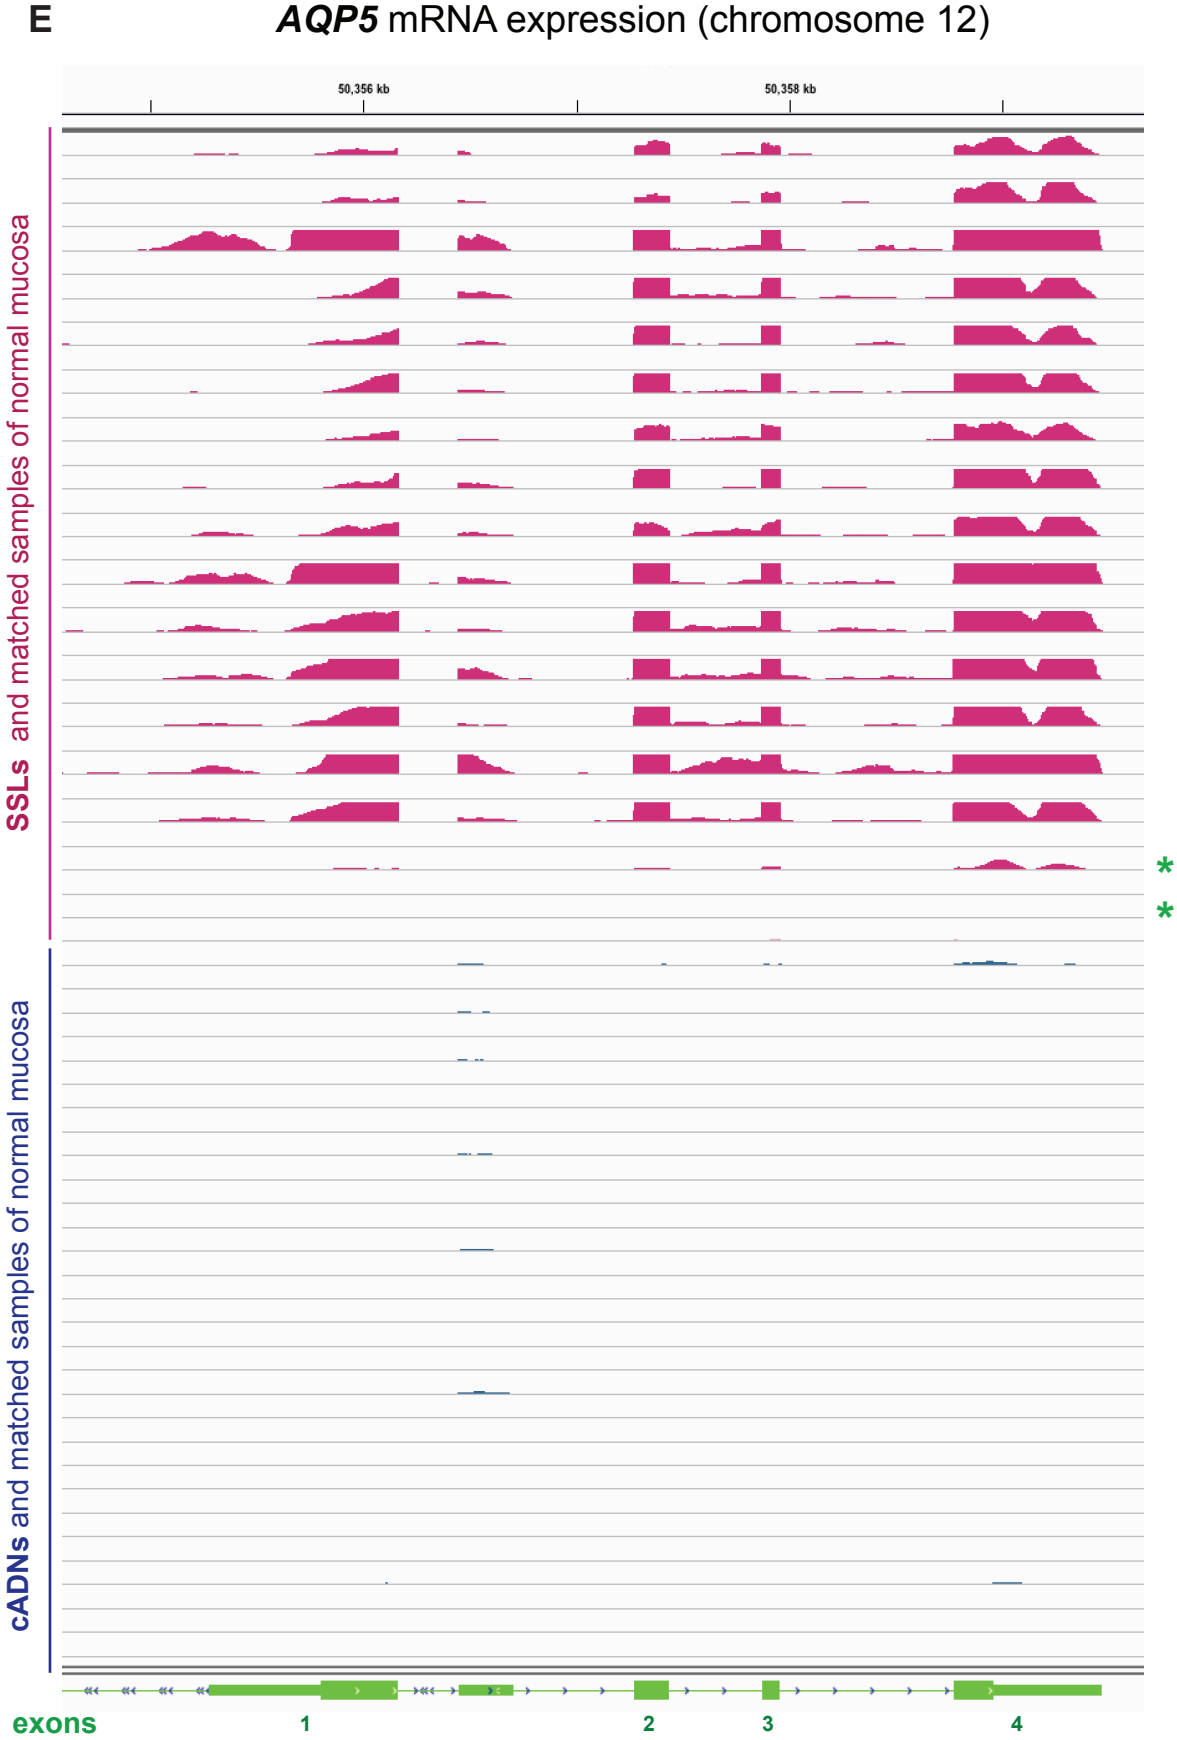

\* The 2 lesions showing histologic features of both SSLs and cADNs (samples S6 and S16 of Table 1, Parker H. et al. 2018)

**F** *LINC00520* mRNA expression (chromosome 14)

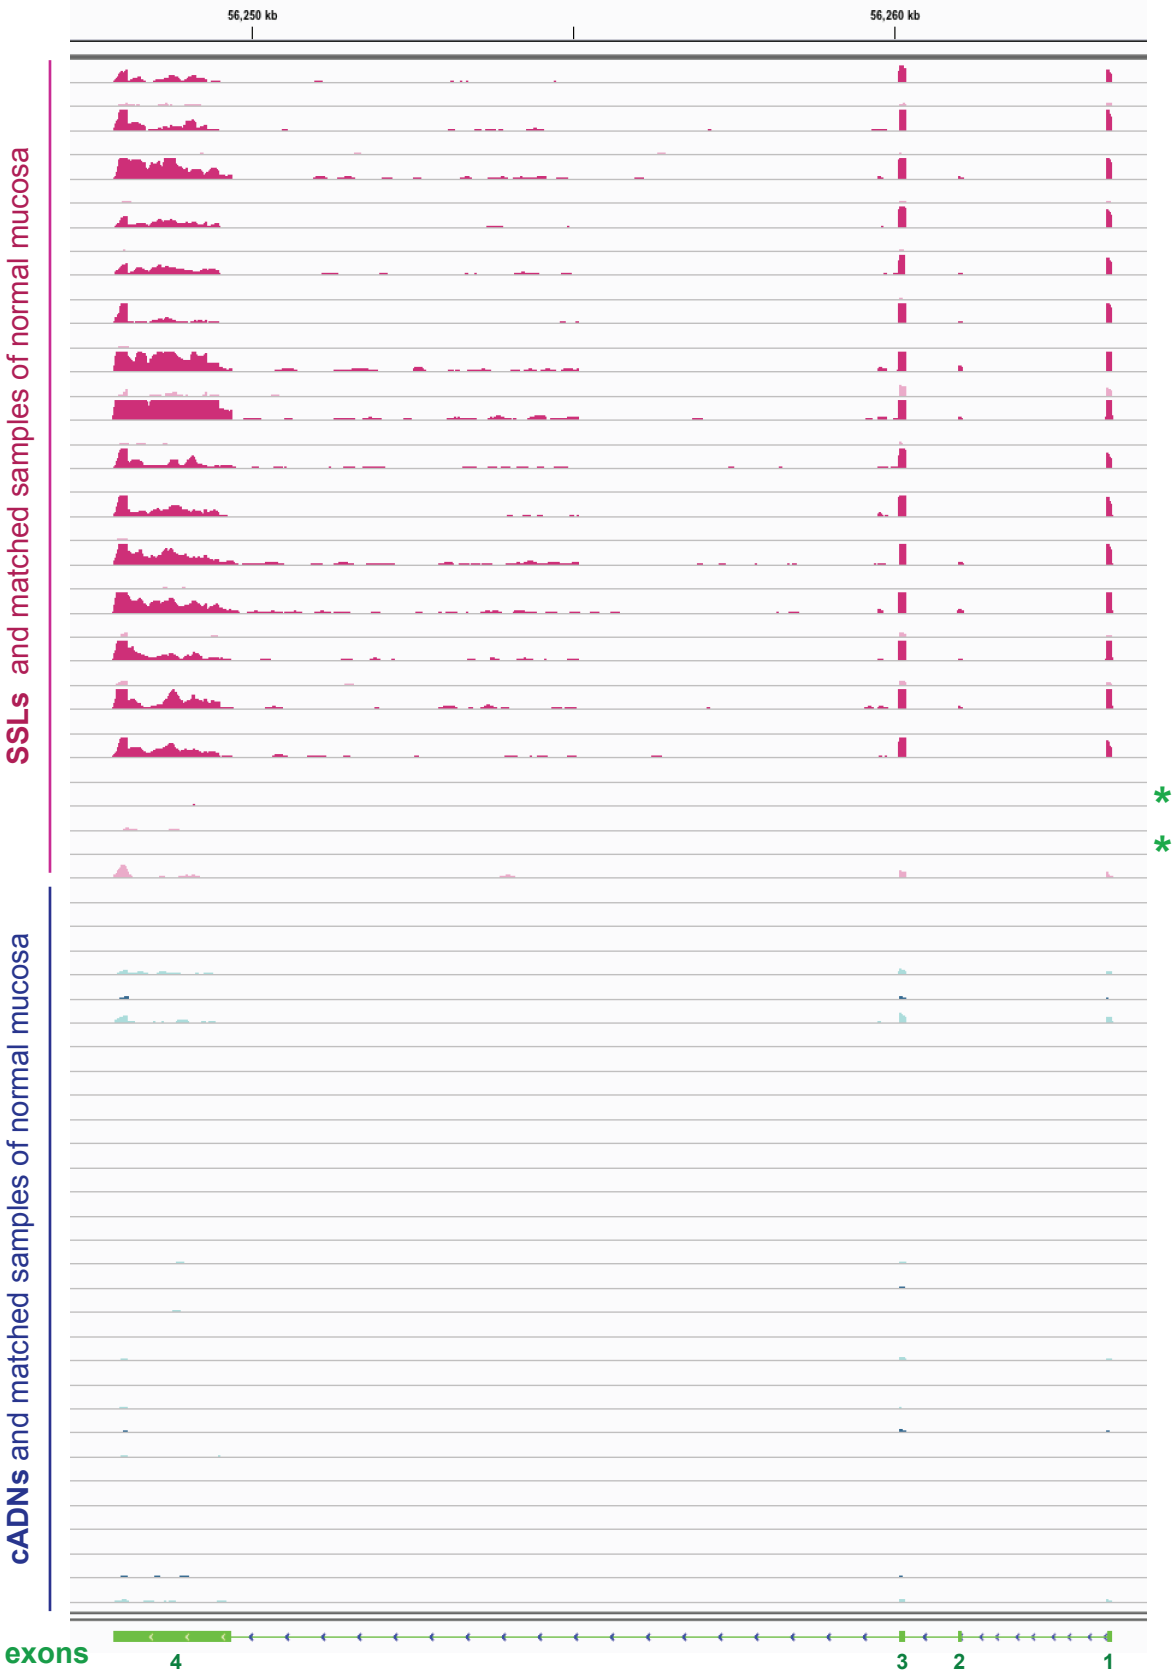

\* The 2 lesions showing histologic features of both SSLs and cADNs (samples S6 and S16 of Table 1, Parker H. et al. 2018)

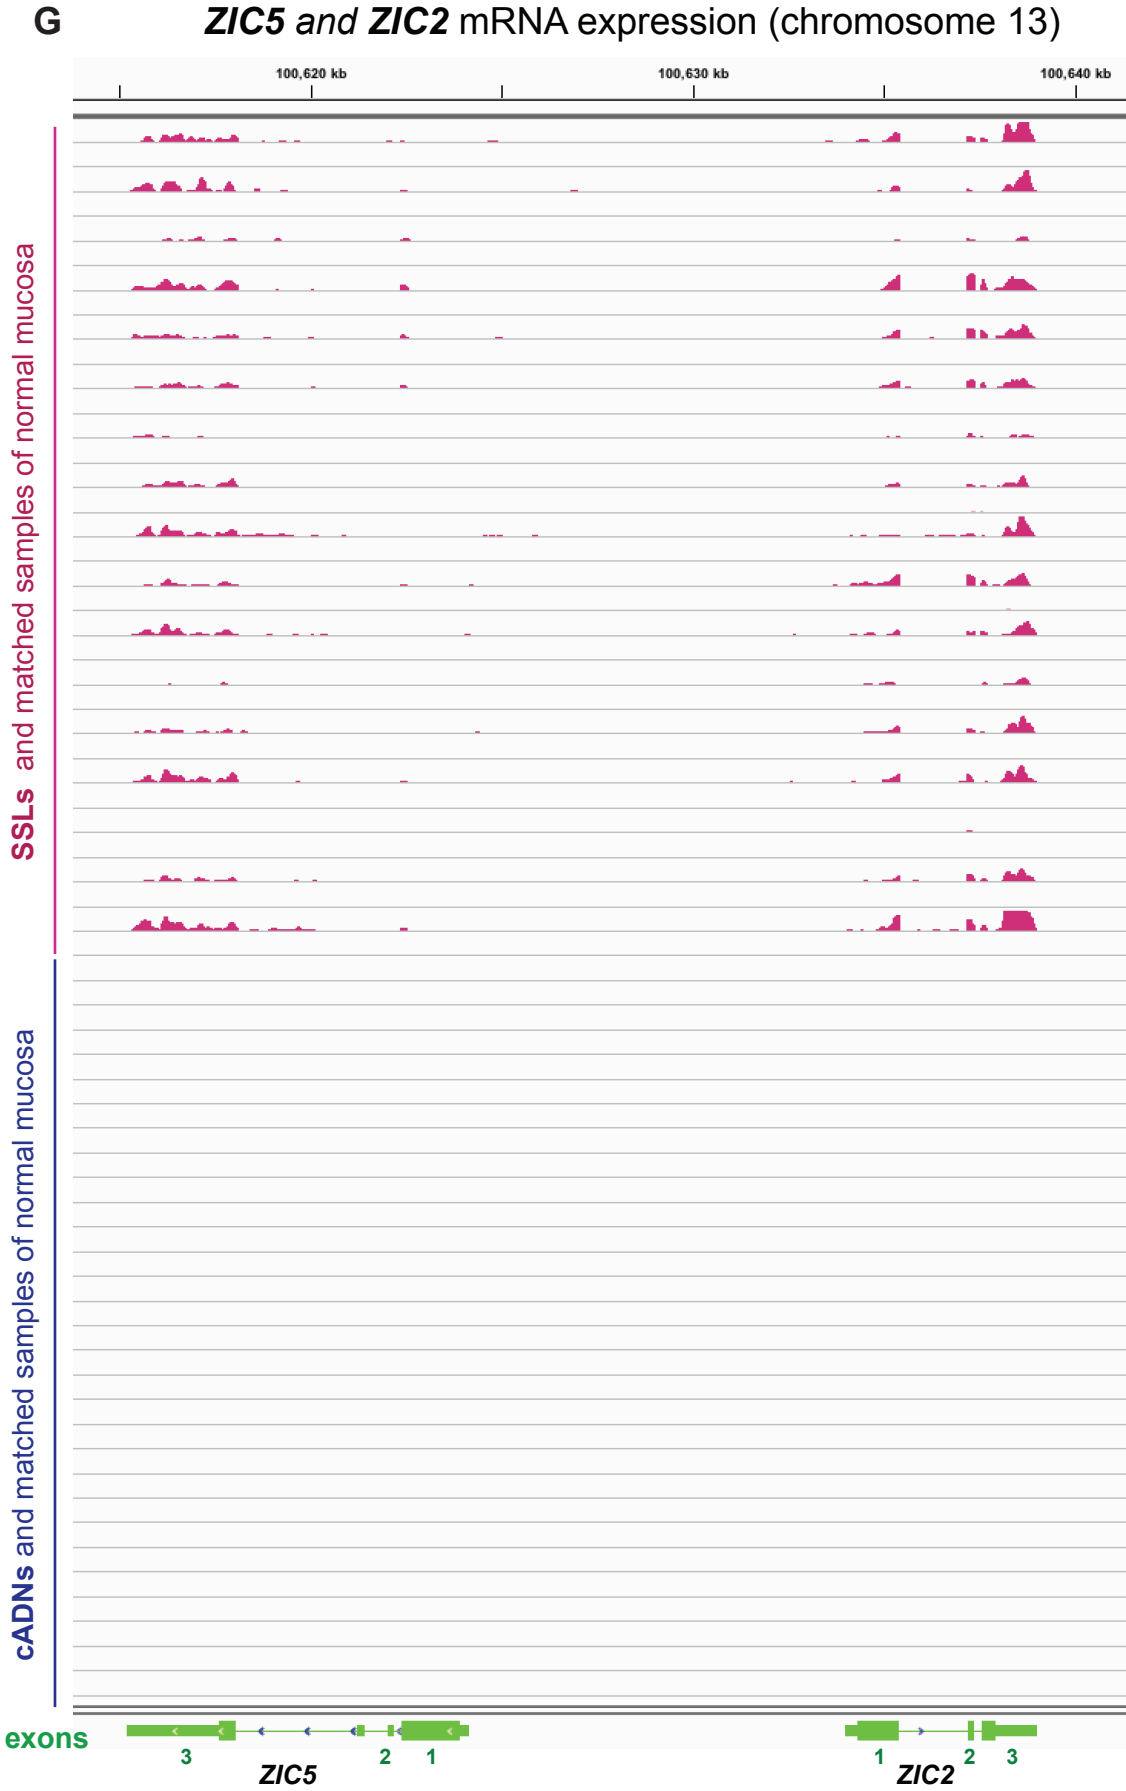

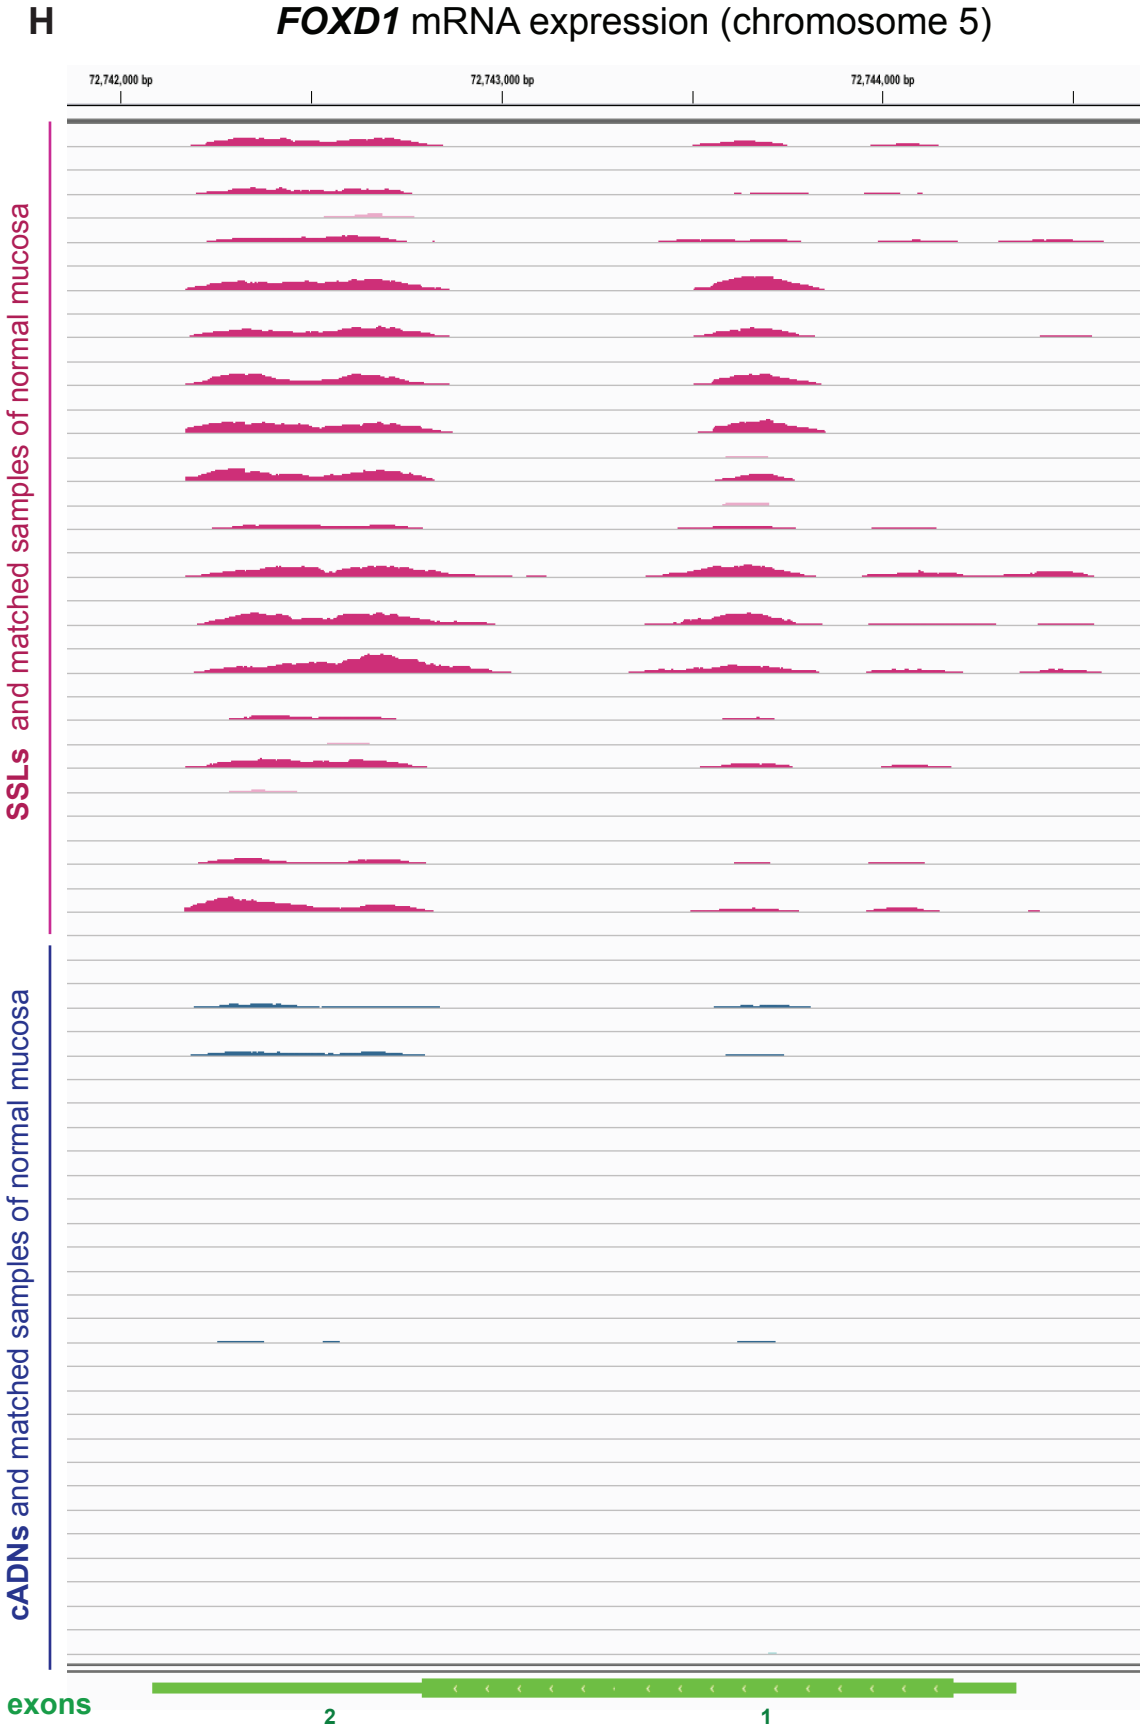



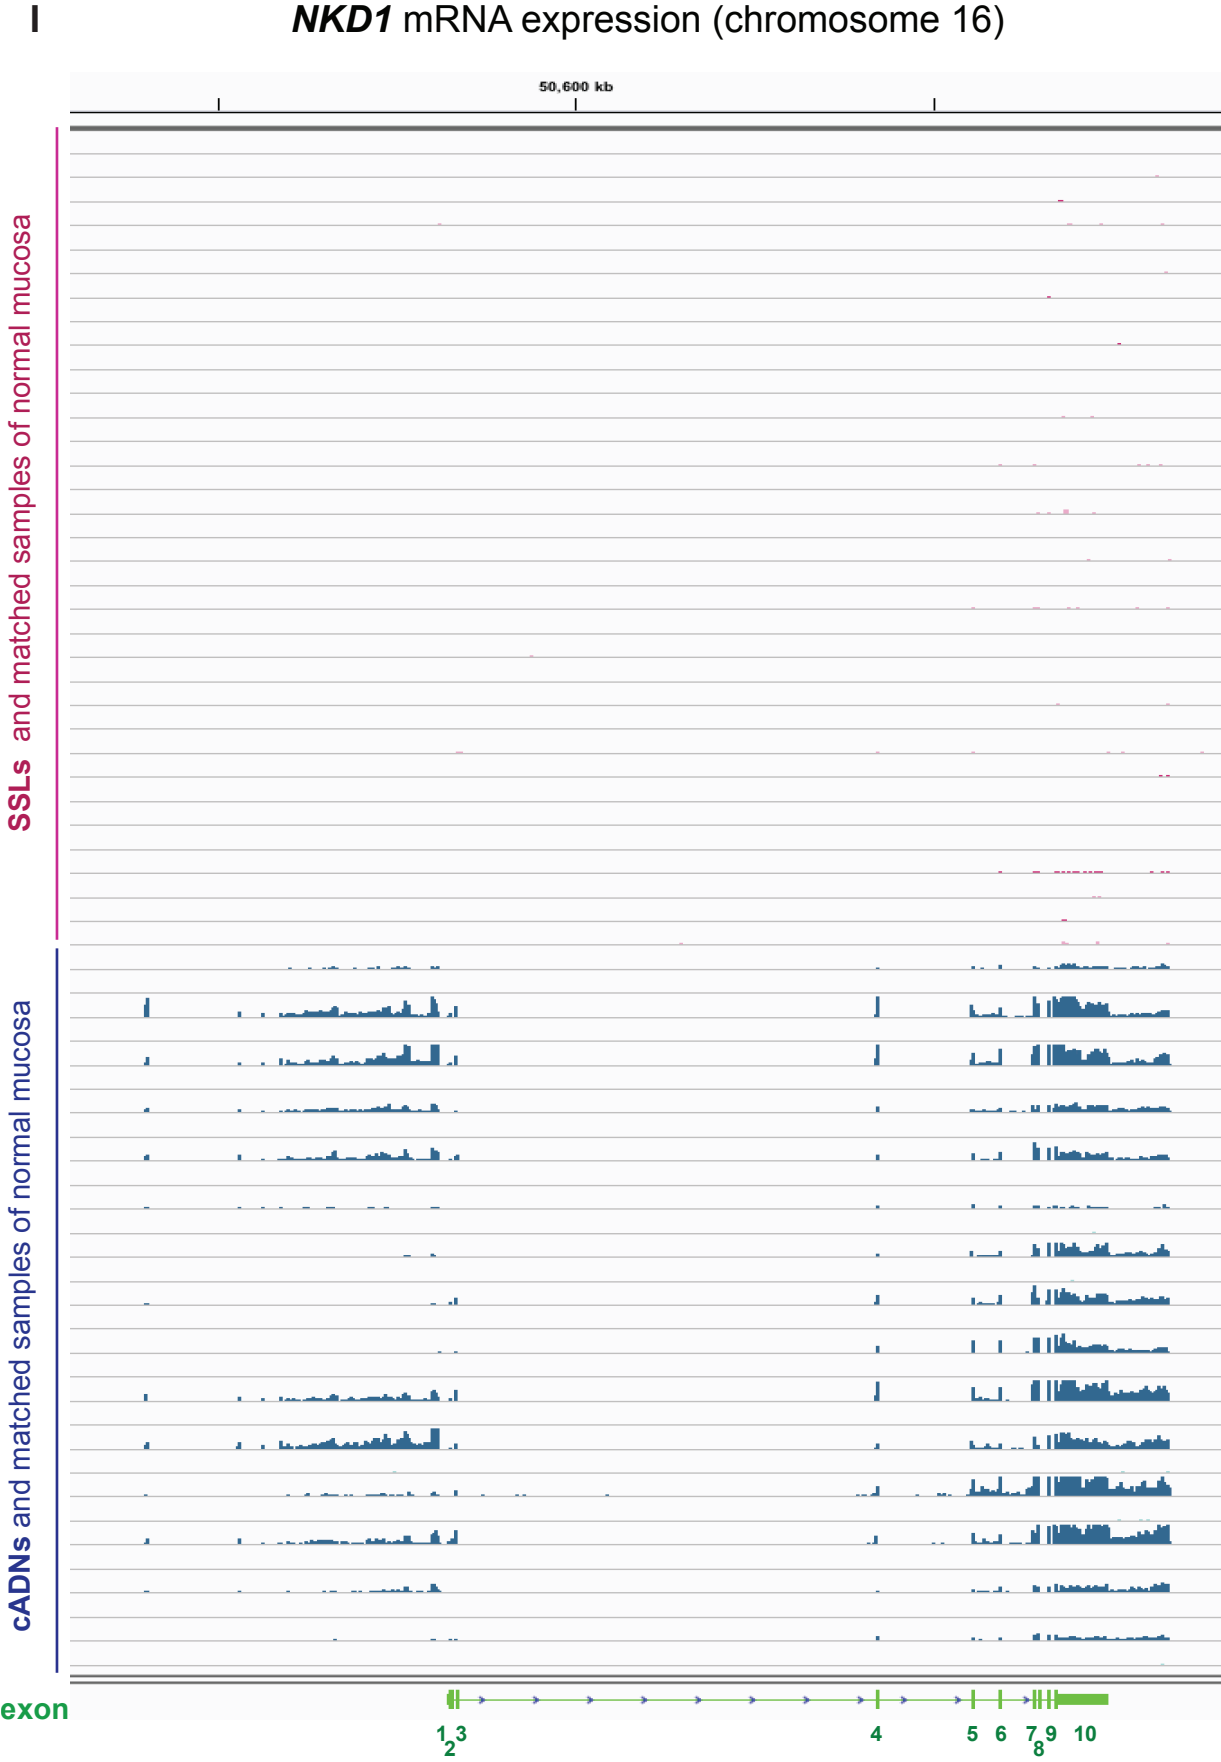

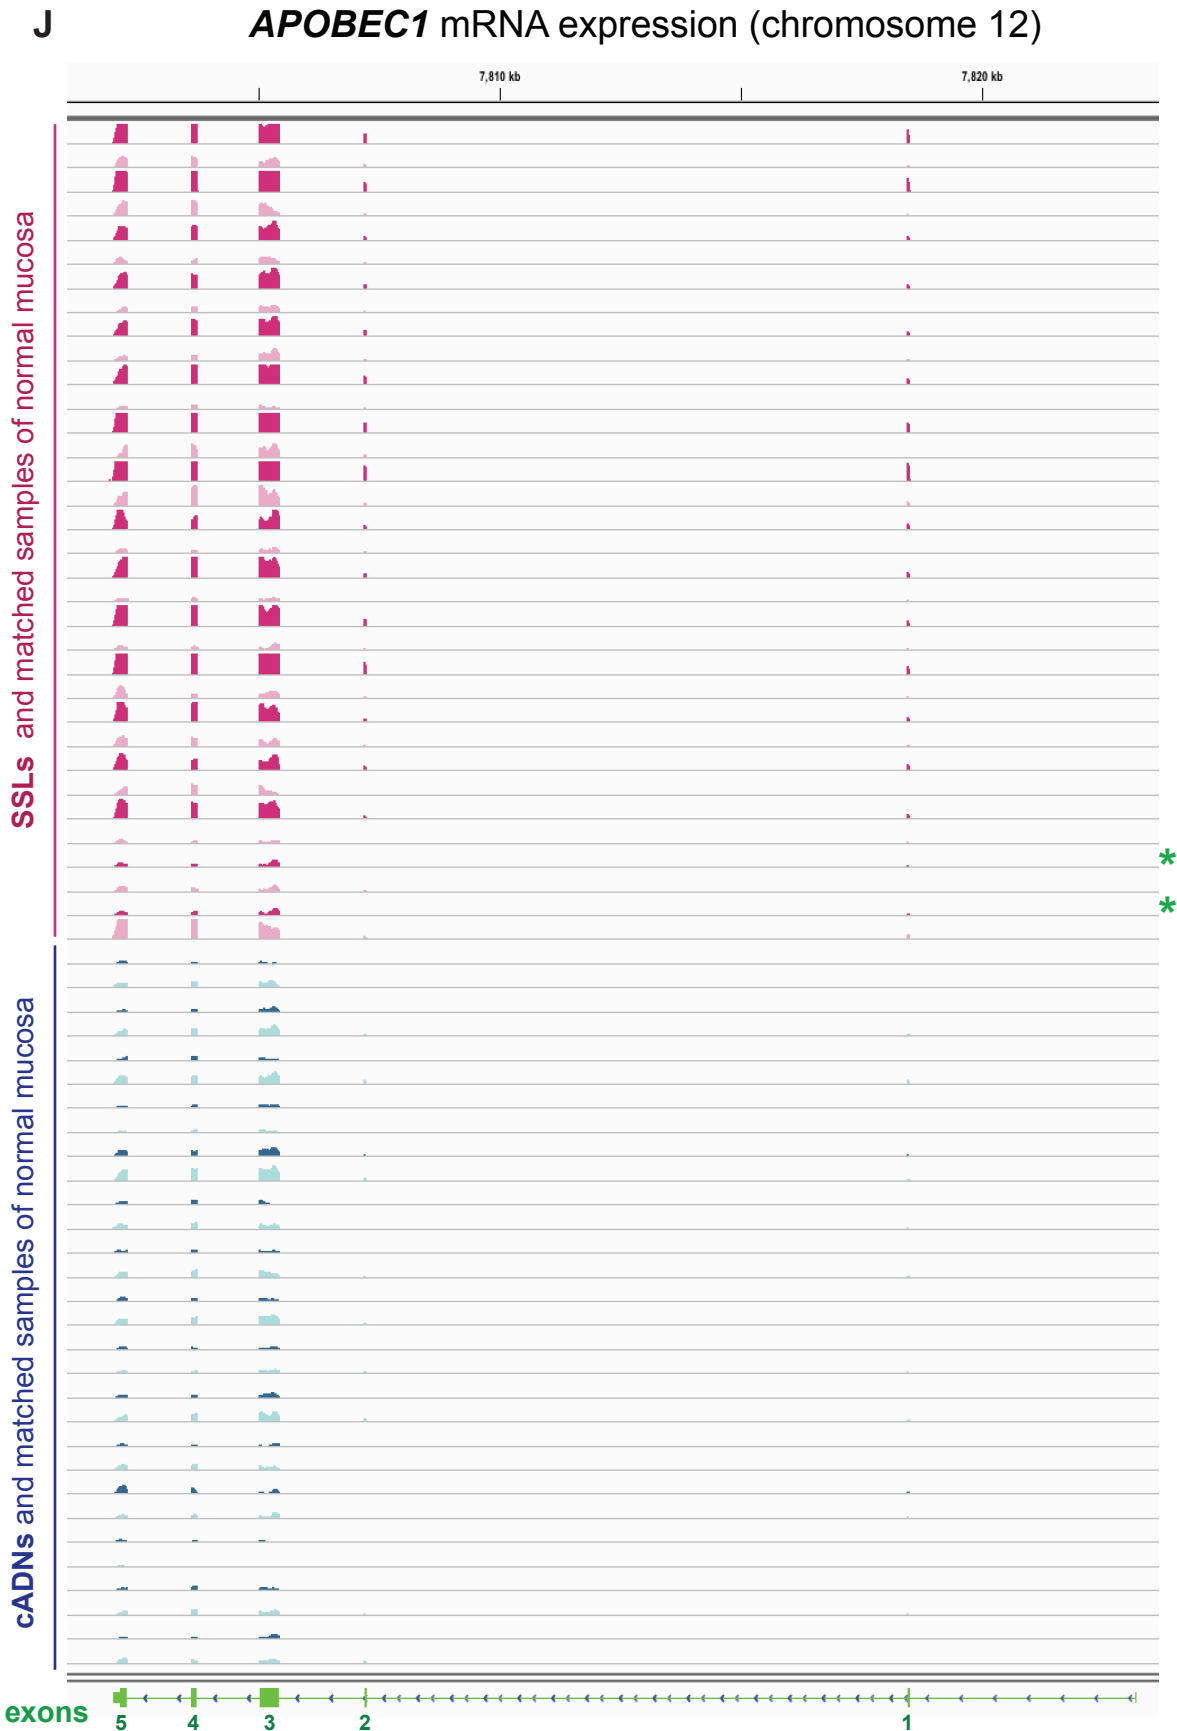

\* The 2 lesions showing histologic features of both SSLs and cADNs (samples S6 and S16 of Table 1, Parker H. et al. 2018)

**K** *MUC5AC* mRNA expression (chromosome 11)

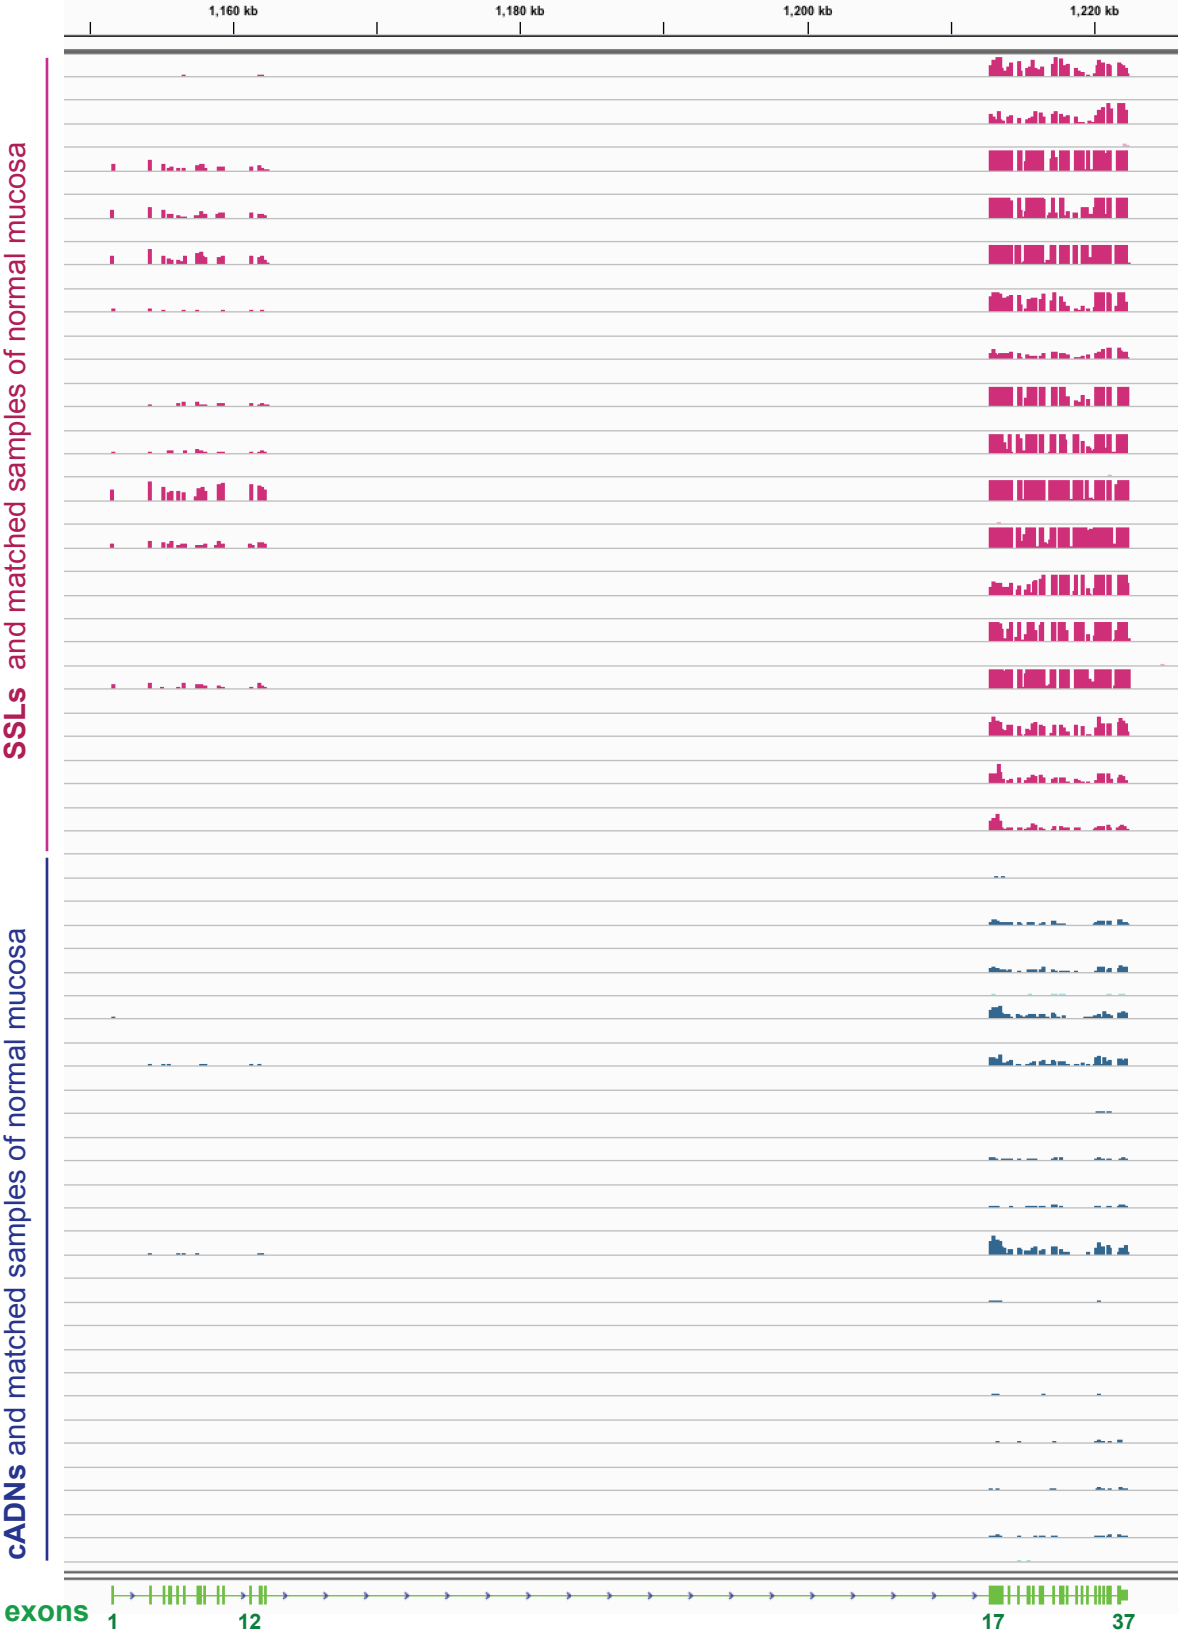

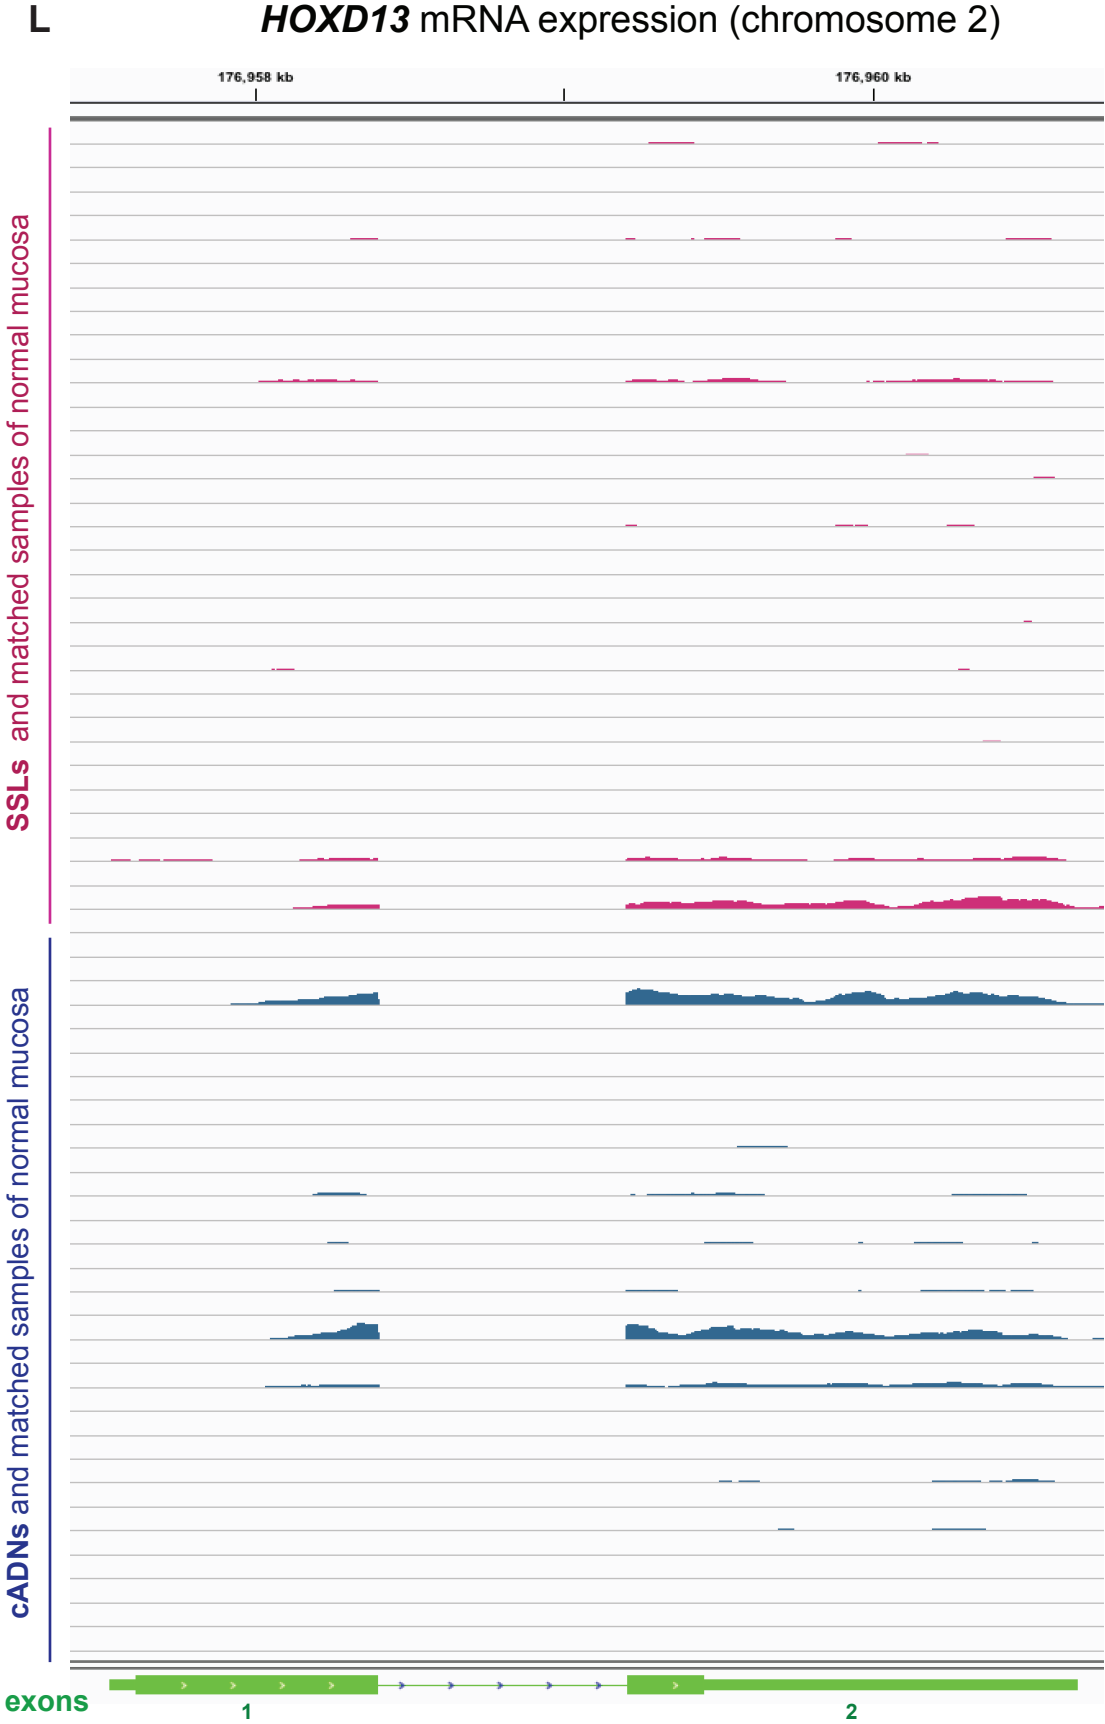

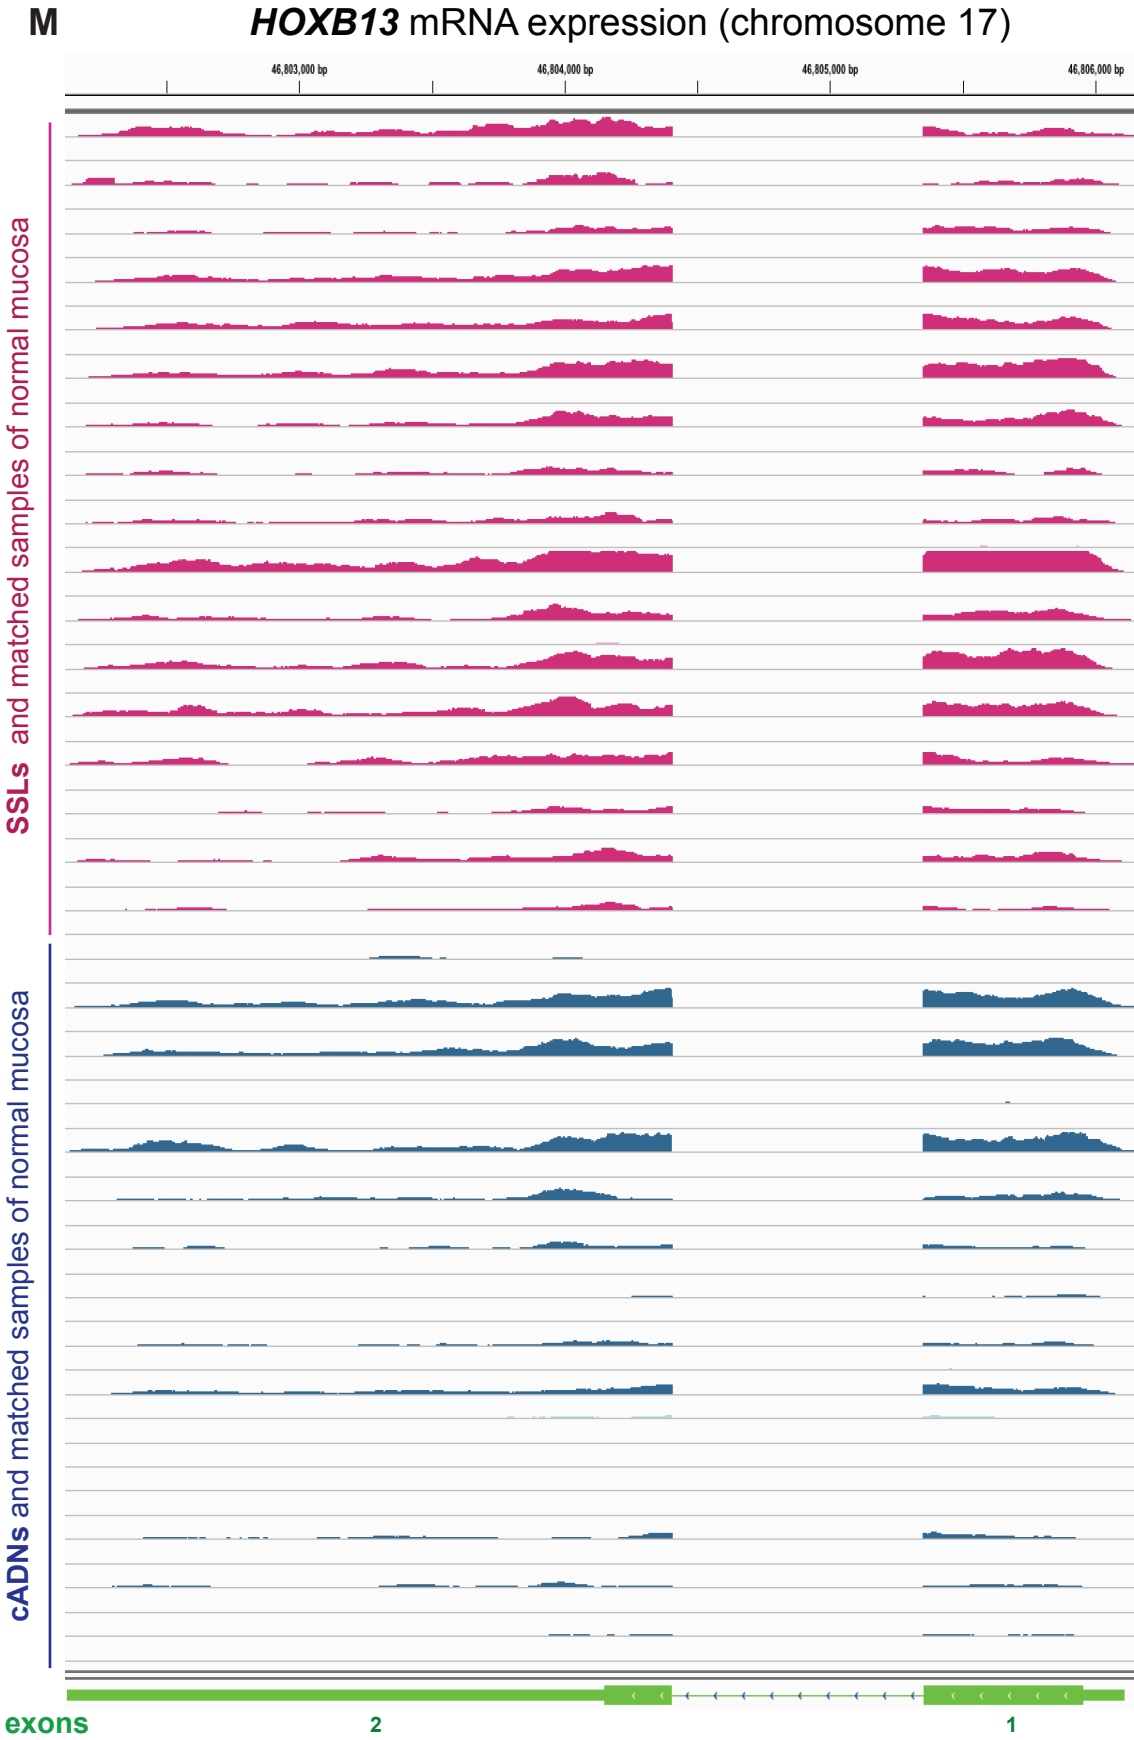

**N** *FAM3B* mRNA expression (chromosome 21)

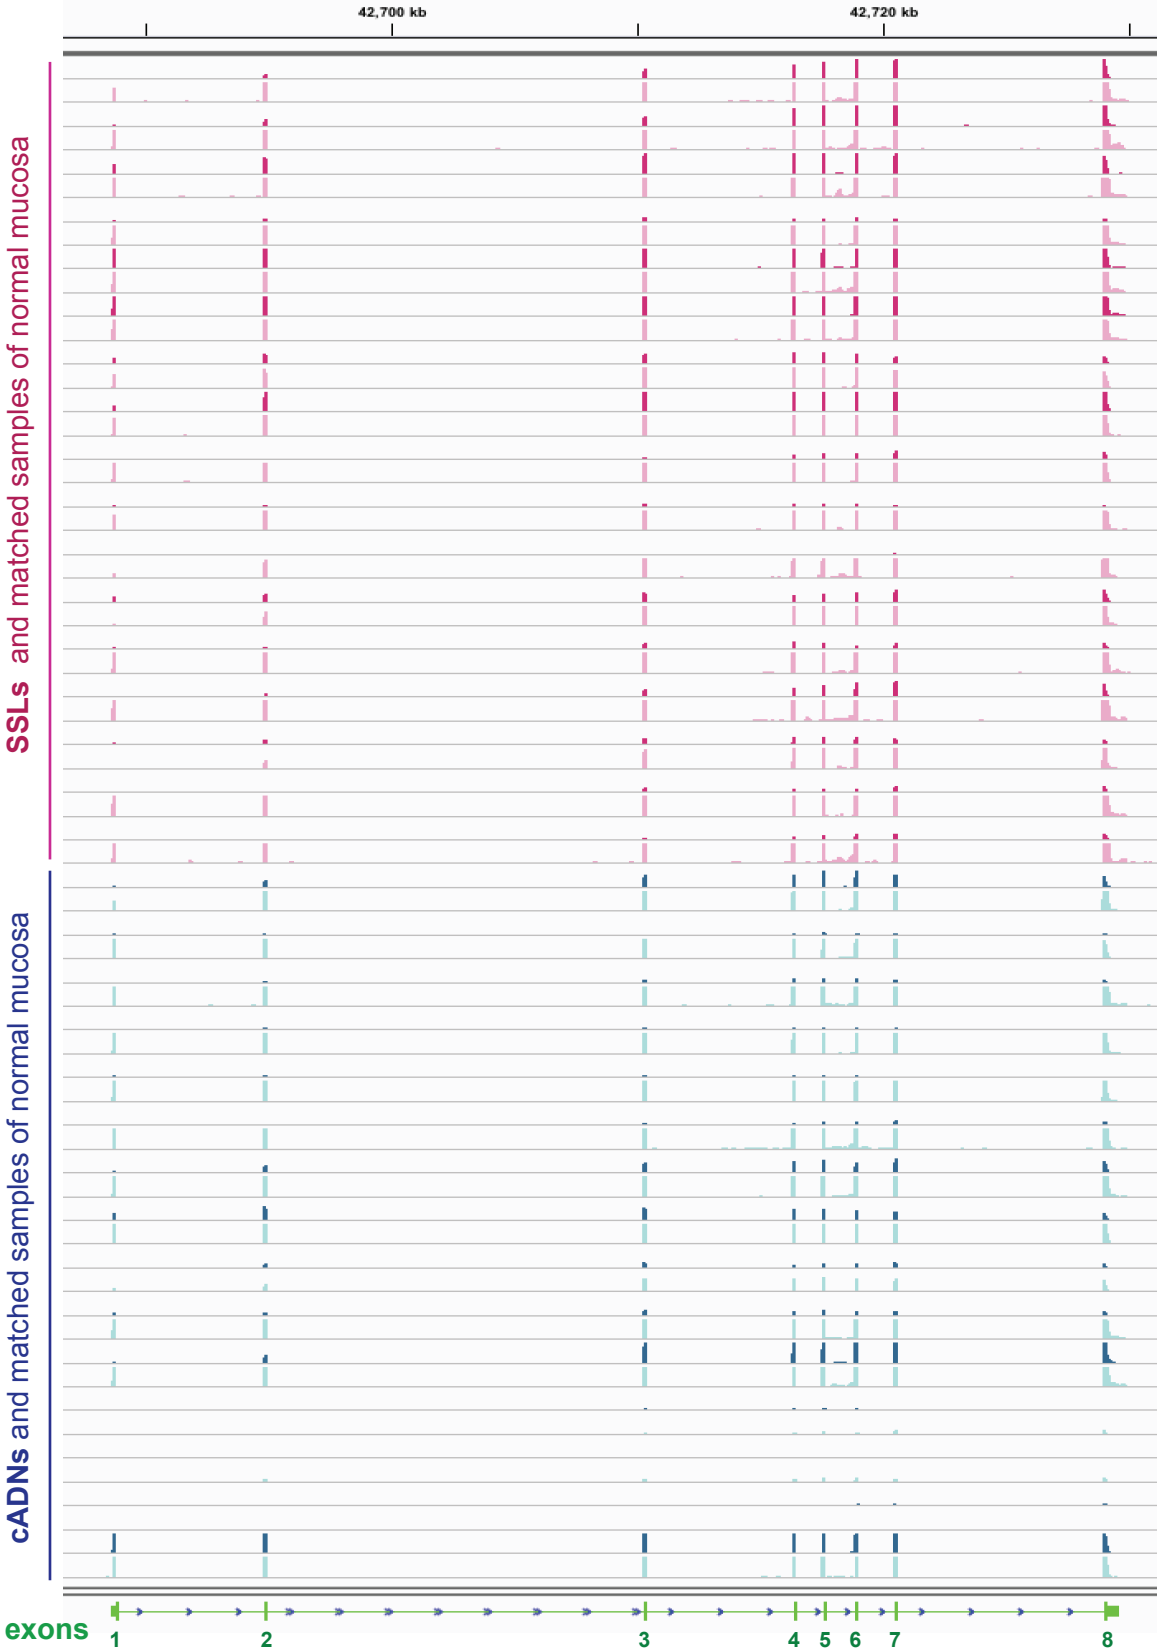

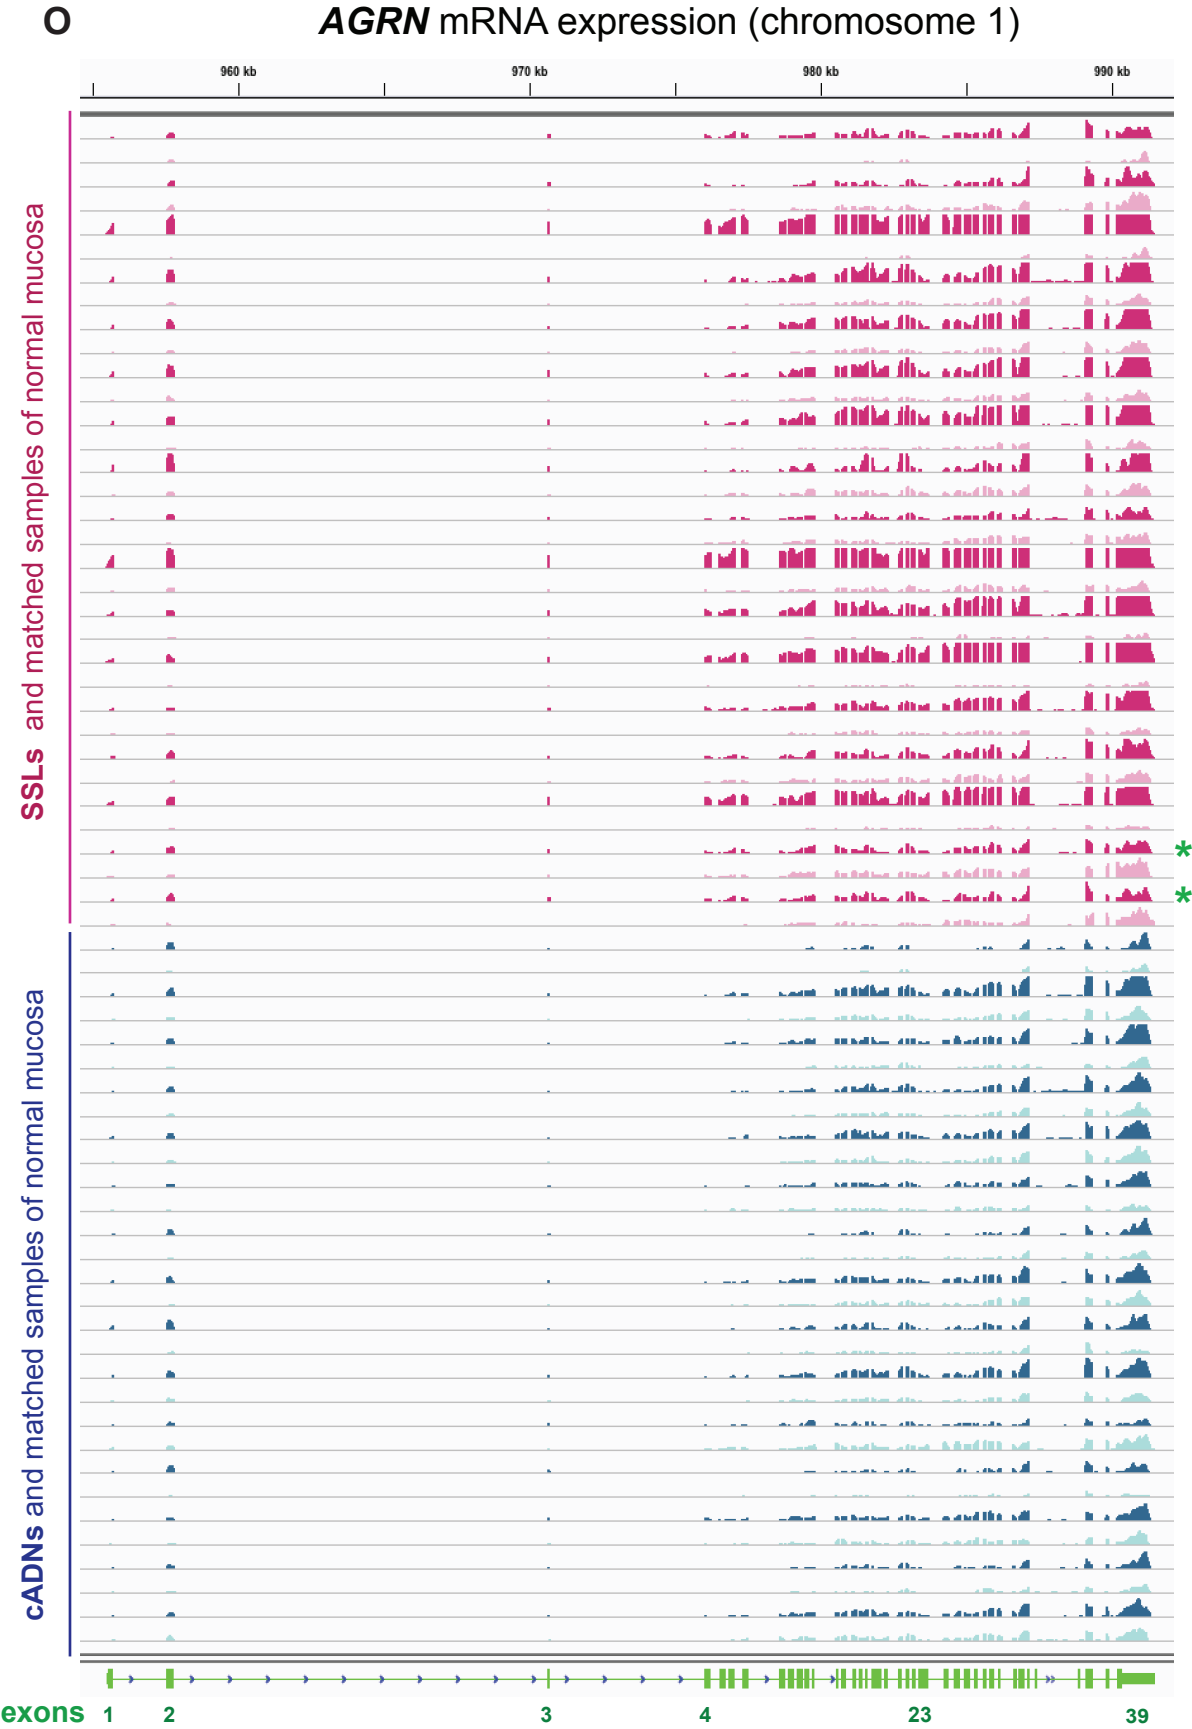

\* The 2 lesions showing histologic features of both SSLs and cADNs (samples S6 and S16 of Table 1, Parker H. et al. 2018)
