# Supplementary material for: An “expressionistic” look at serrated precancerous colorectal lesions
Source: PubMed Central journal article supplement (PMC7797135; doi:10.1186/s13000-020-01064-1), 2021-01-10

**ANXA10**

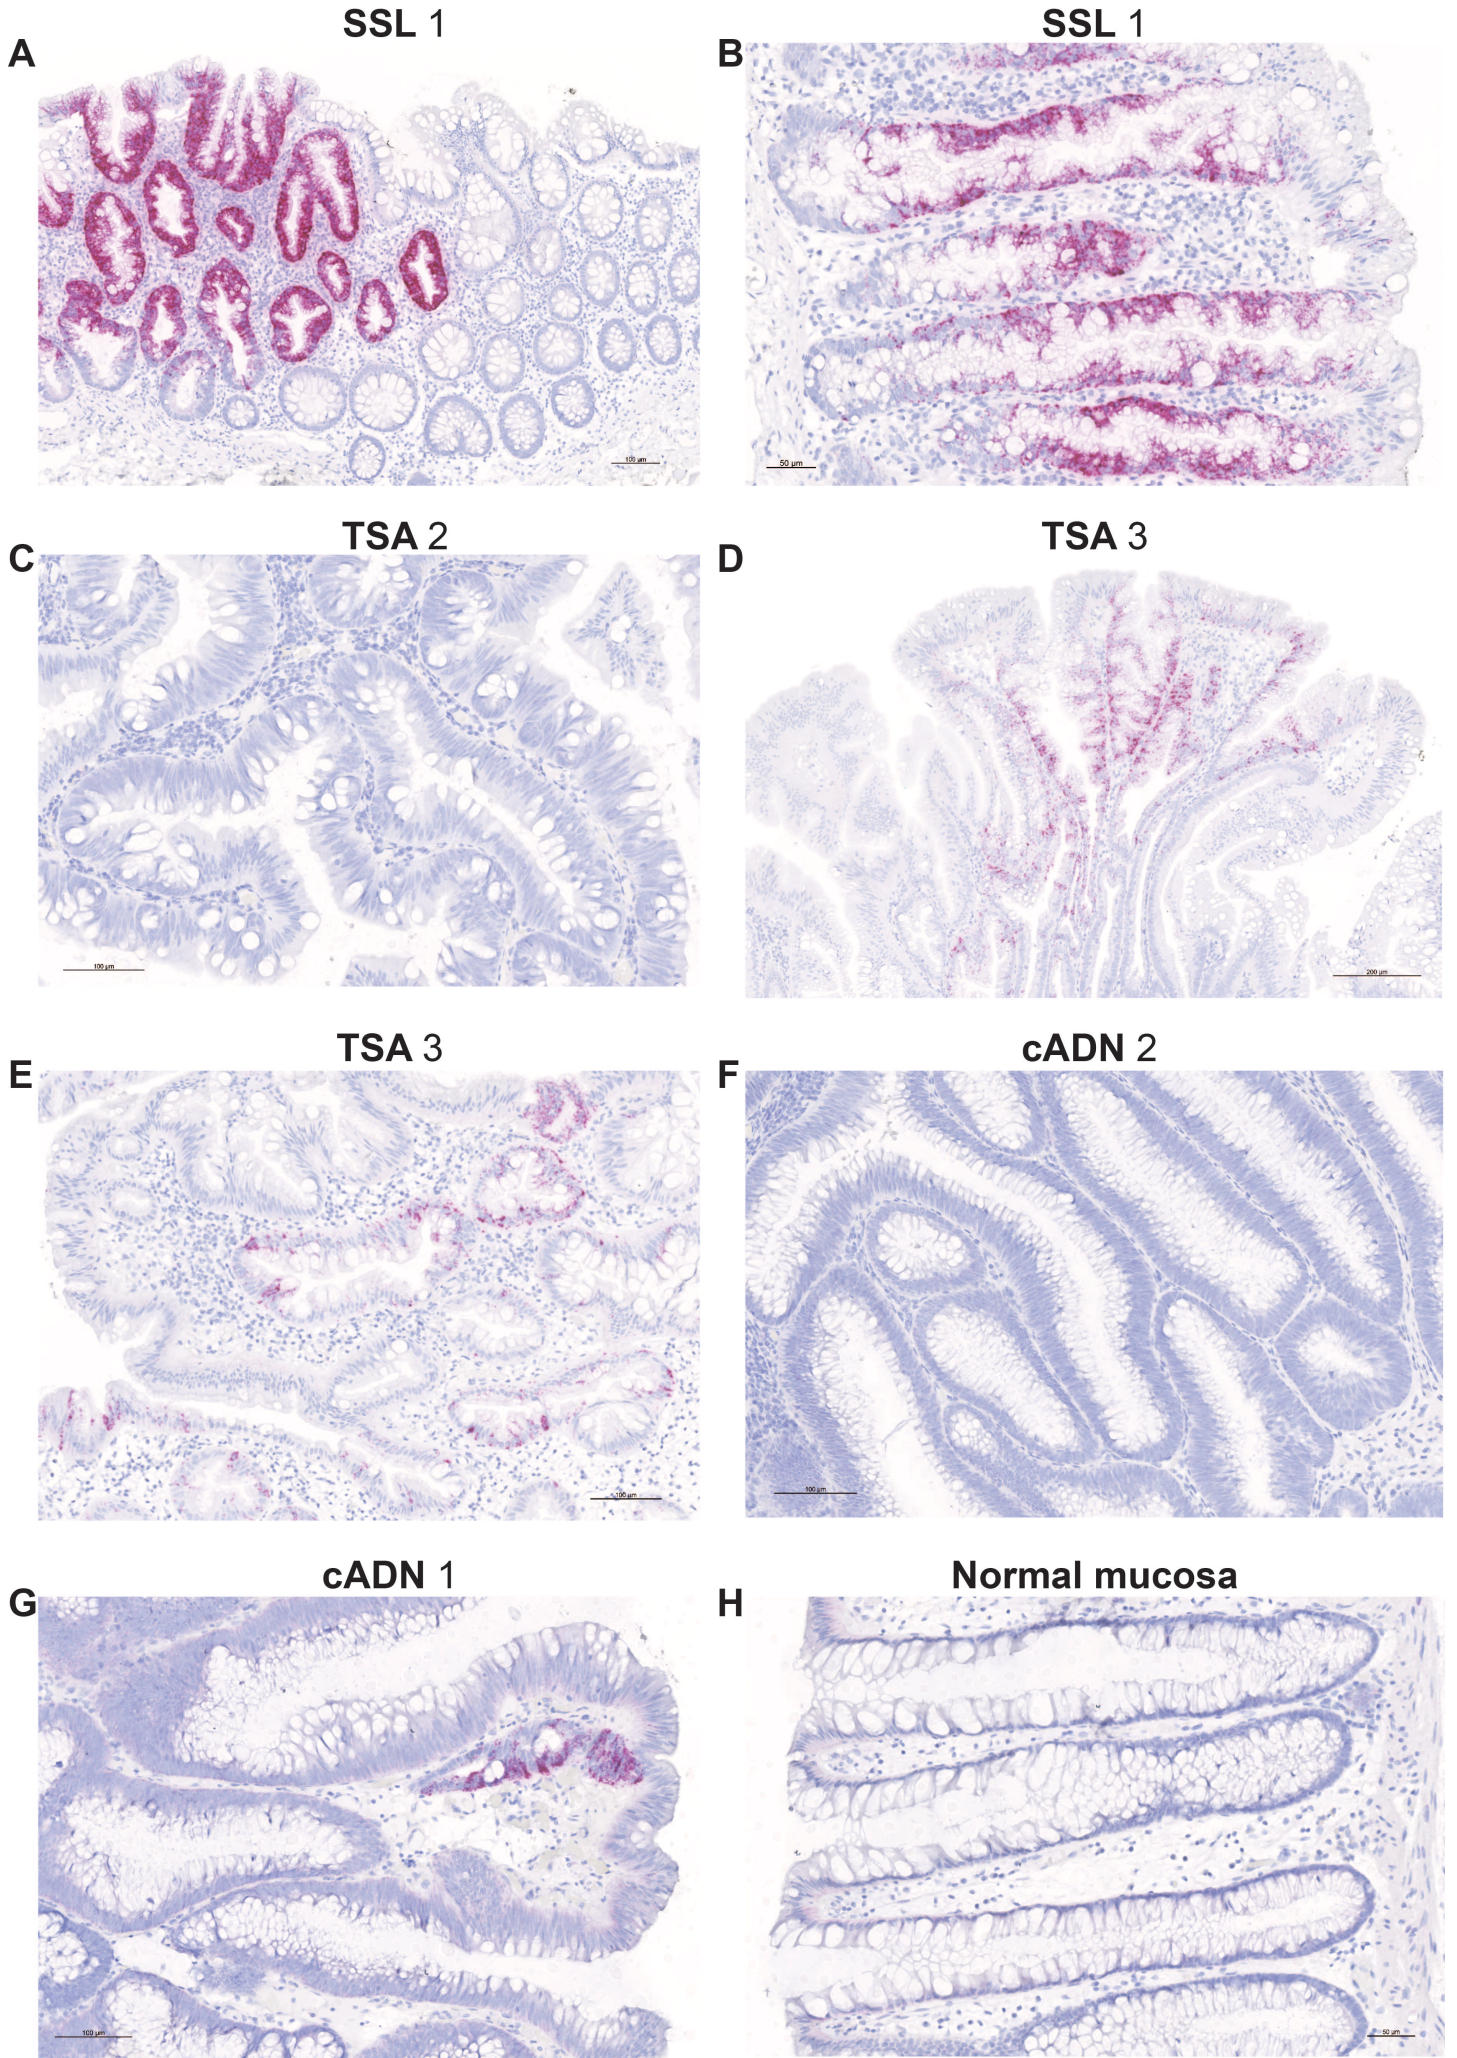

Supplement: 13000_2020_1064_MOESM5_ESM.pdf [file 13000_2020_1064_MOESM5_ESM.pdf]
