# Supplementary material for: An “expressionistic” look at serrated precancerous colorectal lesions
Source: PubMed Central journal article supplement (PMC7797135; doi:10.1186/s13000-020-01064-1), 2021-01-10

**LINC00520**

**SSL 1**

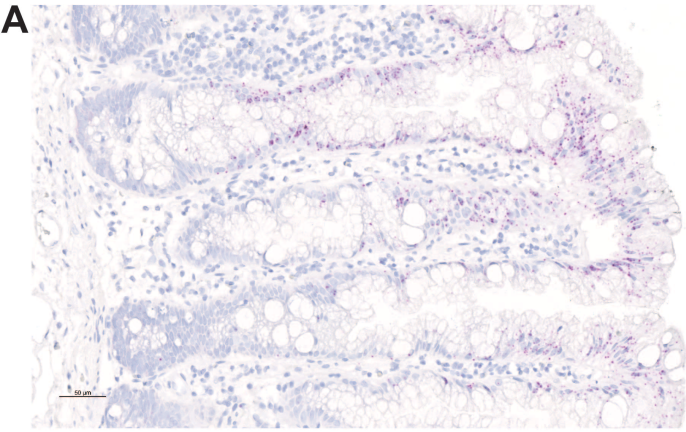

**SSL 2**

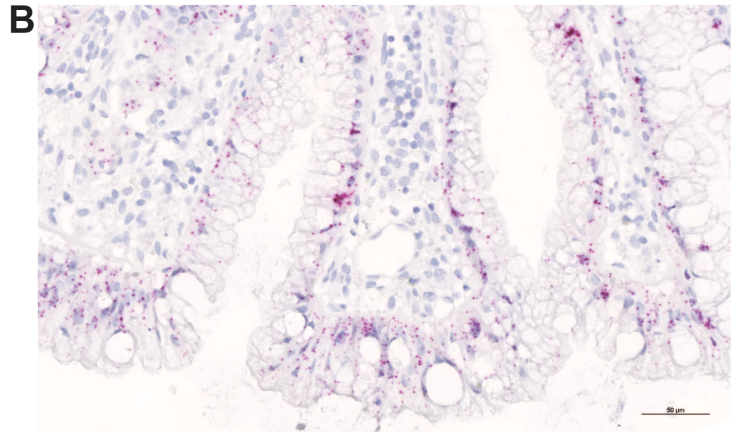

**HP 1**

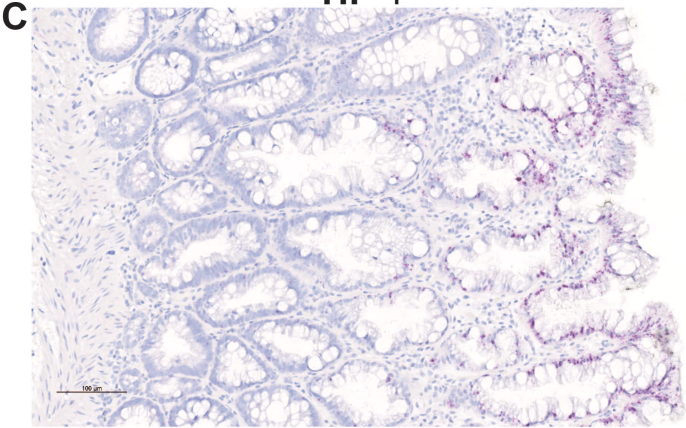

**HP 3**

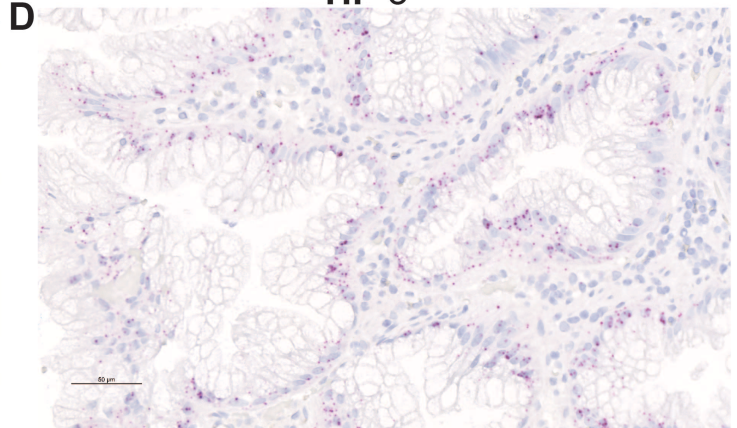

**cADN 1**

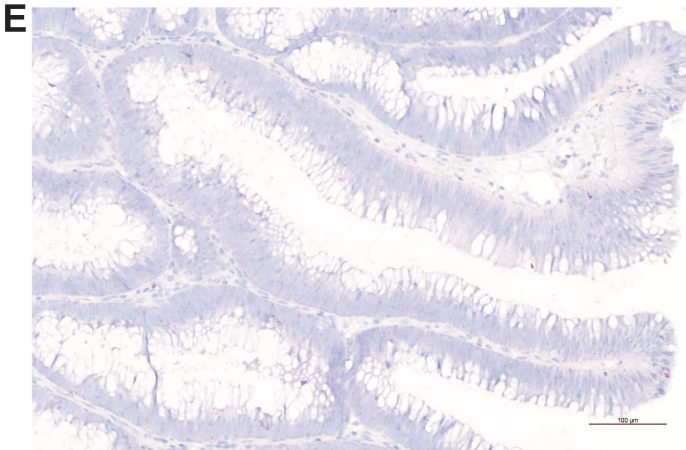

**TSA 2**

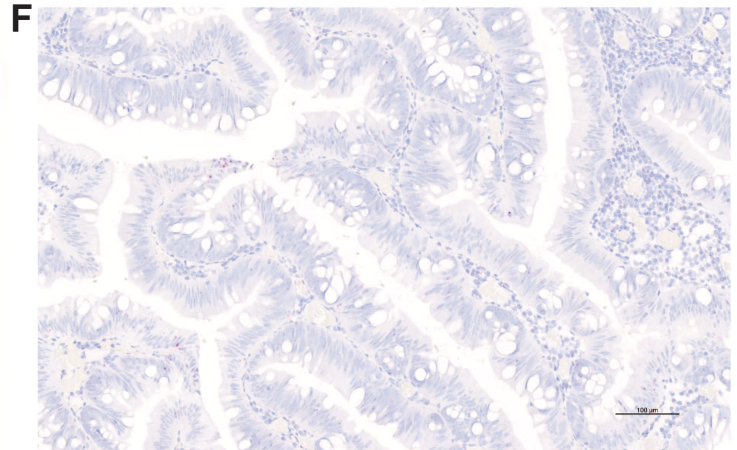

**TSA 3**

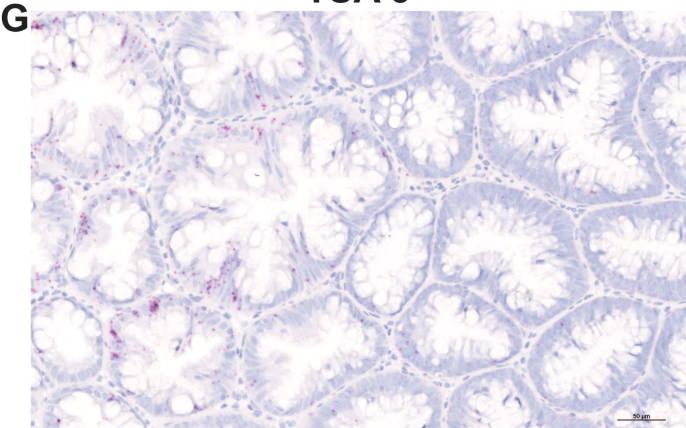

**Normal mucosa**

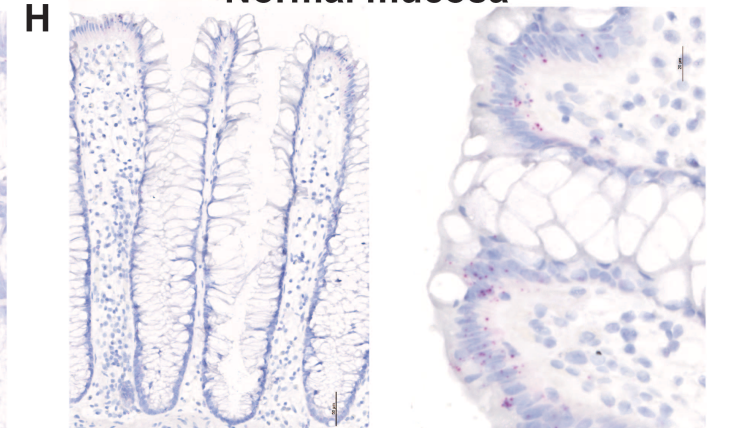

Supplement: 13000_2020_1064_MOESM9_ESM.pdf [file 13000_2020_1064_MOESM9_ESM.pdf]
