# Supplementary material for: An “expressionistic” look at serrated precancerous colorectal lesions
Source: PubMed Central journal article supplement (PMC7797135; doi:10.1186/s13000-020-01064-1), 2021-01-10

**HOXB13**

**SSL 2 (right flexure)**

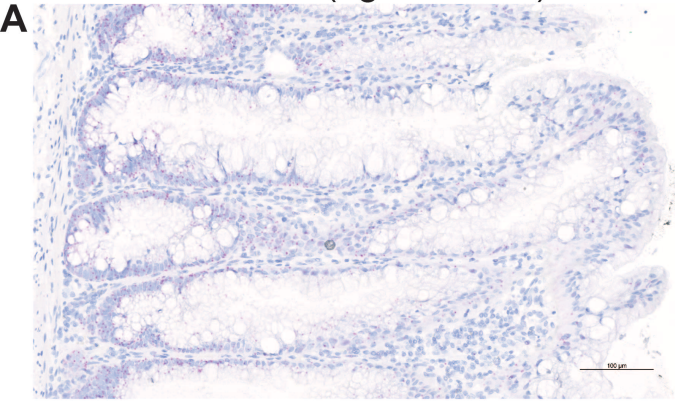

**HP 1 (sigmoid)**

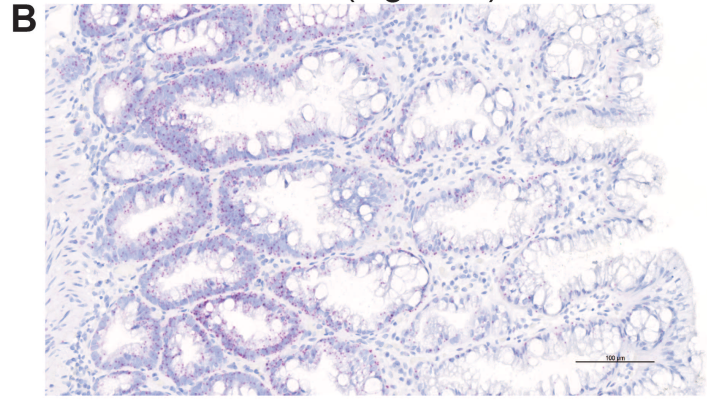

**cADN 1 (transversum)**

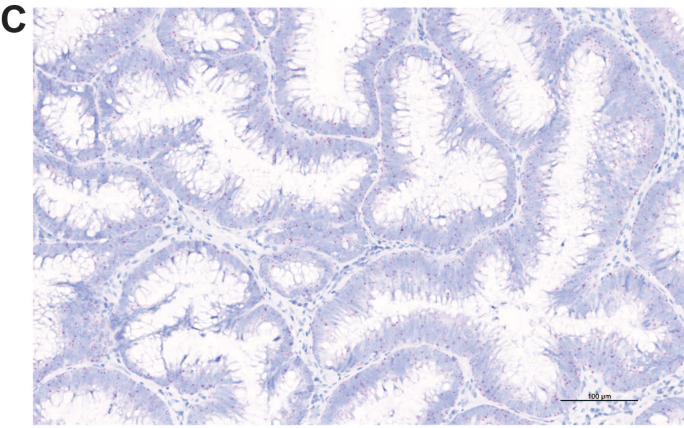

**cADN 2 (rectum)**

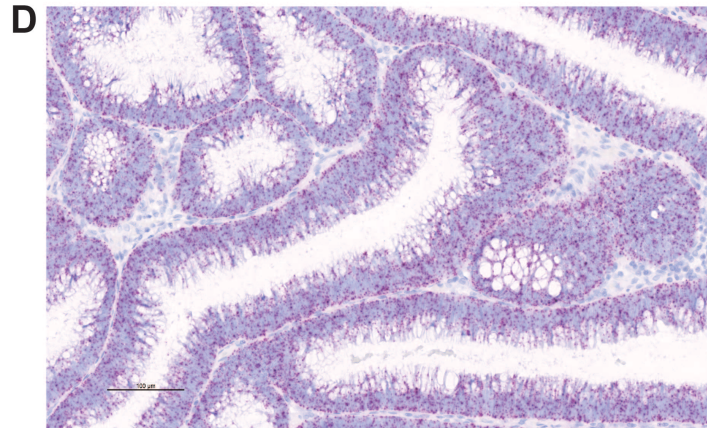

**TSA 2 (rectum)**

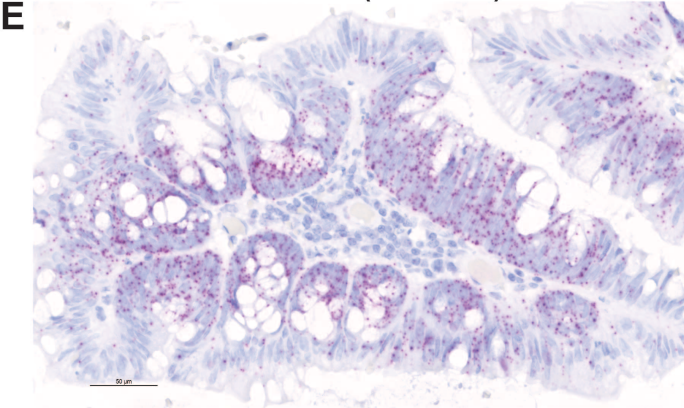

**TSA 3 and Normal mucosa (sigmoid)**

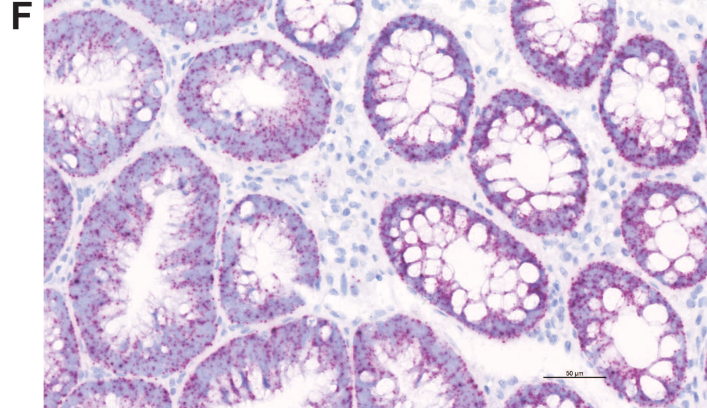

**Normal mucosa (transversum)**

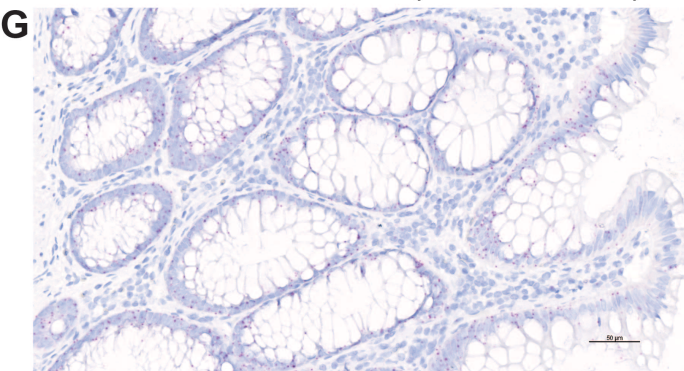

**Normal mucosa (sigmoid)**

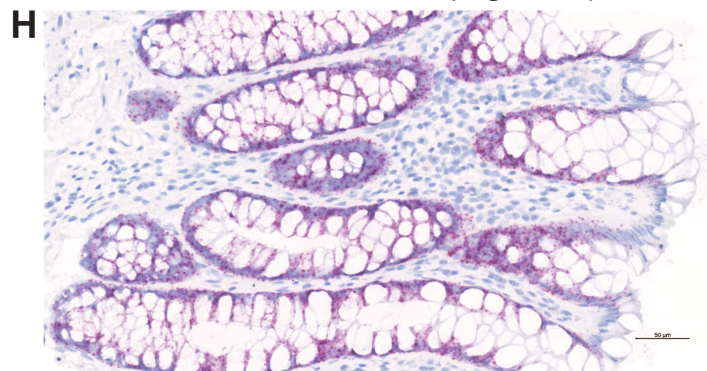

Supplement: 13000_2020_1064_MOESM16_ESM.pdf [file 13000_2020_1064_MOESM16_ESM.pdf]
