# Supplementary material for: An “expressionistic” look at serrated precancerous colorectal lesions
Source: PubMed Central journal article supplement (PMC7797135; doi:10.1186/s13000-020-01064-1), 2021-01-10
Supplement: 13000_2020_1064_MOESM19_ESM.pdf [file 13000_2020_1064_MOESM19_ESM.pdf]

**Supplementary Table 1. mRNA targets chosen for ISH based on RNA sequencing data from Parker H. et al (ref. 21) and Kanth P. et al (ref. 38).**

| <i>gene name</i>   | <i>gene expression pattern (RNA sequencing)</i>       |
|--------------------|-------------------------------------------------------|
| <b>VSIG1</b>       | SSL-specific expression                               |
| <b>ANXA10</b>      | SSL-specific expression                               |
| <b>ZIC2 / ZIC5</b> | SSL-specific expression (neighbouring genes)          |
| <b>SEMG1</b>       | SSL-specific expression                               |
| <b>FOXD1</b>       | SSL-specific expression                               |
| <b>KLK8</b>        | SSL-specific expression                               |
| <b>AQP5</b>        | SSL-specific expression                               |
| <b>MUC5AC</b>      | SSL-specific expression                               |
| <b>LINC00520</b>   | SSL-specific expression                               |
| <b>NKD1</b>        | cADNs-specific                                        |
| <b>APOBEC1</b>     | downregulated in cADNs                                |
| <b>ACHE</b>        | downregulated in cADNs                                |
| <b>HOXD13</b>      | HP-specific                                           |
| <b>EVX2</b>        | <i>HOXD13</i> neighbouring gene                       |
| <b>HOXB13</b>      | HP-specific                                           |
| <b>PRAC1</b>       | <i>HOXB13</i> neighbouring gene                       |
| <b>INSL5</b>       | HP-specific                                           |
| <b>OR51E2</b>      | HP-specific                                           |
| <b>CPB1</b>        | HP-specific                                           |
| <b>ST6GAL2</b>     | HP-specific                                           |
| <b>FAM3B</b>       | no expression in HPs                                  |
| <b>PPIB</b>        | positive control: expressed in most of the cells      |
| <b>DapB</b>        | negative control (bacterial gene)                     |
| <b>XIST</b>        | positive (female cells)/negative (male cells) control |
